1 **Clinically Relevant Gene Editing in Hematopoietic Stem Cells for the Treatment of Pyruvate**  
2 **Kinase Deficiency Hemolytic Anemia**

3 Sara Fañanas-Baquero<sup>1,2,#</sup>, Oscar Quintana-Bustamante<sup>1,2,#</sup>, Daniel P. Dever<sup>3</sup>, Omaira  
4 Alberquilla<sup>1,2</sup>, Rebeca Sanchez<sup>1,2</sup>, Joab Camarena<sup>3</sup>, Isabel Ojeda-Perez<sup>1,2</sup>, Mercedes Dessy-  
5 Rodriguez<sup>1,2</sup>, Rolf Turk<sup>4</sup>, Mollie S. Schubert<sup>4</sup>, Jose L. Lopez-Lorenzo<sup>5</sup>, Paola Bianchi<sup>6</sup>, Juan A.  
6 Bueren<sup>1,2</sup>, Mark A. Behlke<sup>4</sup>, Matthew Porteus<sup>3</sup>, Jose-Carlos Segovia<sup>1,2,\*</sup>

7 <sup>1</sup>Hematopoietic Innovative Therapies Division, Centro de Investigaciones Energéticas,  
8 Medioambientales y Tecnológicas (CIEMAT) and Centro de Investigación Biomédica en Red de  
9 Enfermedades Raras (CIBERER), Madrid, Spain.

10 <sup>2</sup>Unidad Mixta de Terapias Avanzadas. Instituto de Investigación Sanitaria Fundación Jiménez.  
11 (IIS-FJD, UAM). Madrid, Spain

12 <sup>3</sup>Department of Pediatrics, Stanford University, Stanford, California, USA

13 <sup>4</sup>Integrated DNA Technologies, Coralville, Iowa, USA

14 <sup>5</sup>Hospital Universitario Fundación Jiménez Díaz. Instituto de Investigación Sanitaria Fundación  
15 Jiménez Díaz (IIS-FJD, UAM). Madrid, Spain

16 <sup>6</sup>UOC Ematologia, Fisiopatologia delle Anemie, Fondazione IRCCS Ca' Granda Ospedale Maggiore  
17 Policlinico Milano, Milan, Italy

18

19

20 <sup>#</sup>Both authors should be considered as first authors of the paper

21 <sup>\*</sup>Corresponding author:

22 Jose-Carlos Segovia

23 CIEMAT (Building 70). Av. Complutense, 40. 28040 Madrid. Spain

24 Tfn: +34913466268

25 Fax: +34913466484

26 E-mail: [jc.segovia@ciemat.es](mailto:jc.segovia@ciemat.es)

27

28 **Single Sentence Summary:** Clinically relevant gene editing in hematopoietic stem cells for the  
29 treatment of Pyruvate Kinase Deficiency.

30 **Short title :** Clinically applicable Gene Editing for PKD

31

32 **ABSTRACT**

33 Pyruvate Kinase Deficiency (PKD) is an autosomal recessive disorder caused by mutations in the  
34 *PKLR* gene, which constitutes the main cause of chronic non-spherocytic hemolytic anemia. PKD  
35 incidence is estimated in 1 in 20,000 people worldwide. The *PKLR* gene encodes for the erythroid  
36 pyruvate kinase protein (RPK) implicated in the last step of the anaerobic glycolysis in red blood  
37 cells. The defective enzyme fails to maintain normal erythrocyte ATP levels, producing severe  
38 hemolytic anemia, and can be fatal in severe patients. The only curative treatment for PKD is  
39 allogeneic hematopoietic stem and progenitor cells (HSPC) transplantation, so far. However,  
40 HSPC transplant is associated with a significant morbidity and mortality, especially in PKD  
41 patients. Here, we address the correction of PKD through precise gene editing at the *PKLR*  
42 endogenous locus to keep the tight regulation of RPK enzyme during erythropoiesis. We  
43 combined CRISPR/Cas9 system and rAAVs for donor matrix delivery to build an efficient and safe  
44 system to knock-in a therapeutic donor at the translation start site of the RPK isoform in human  
45 hematopoietic progenitors. Edited human hematopoietic progenitors efficiently reconstituted  
46 human hematopoiesis in primary and secondary immunodeficient recipient mice. Moreover,  
47 erythroid cells derived from edited PKD-HSPCs restored normal levels of ATP, demonstrating the  
48 restoration of RPK function in PKD erythropoiesis after gene editing. Our gene editing strategy  
49 may represent a lifelong therapy to restore RPK functionality in RBCs of patients and correct  
50 PKD.

51

## 52 INTRODUCTION

53 Pyruvate Kinase Deficiency is an inherited autosomal recessive metabolic disorder produced by  
54 mutations in the Liver and Erythroid Pyruvate Kinase Gene (*PKLR*), which encodes for liver (LPK)  
55 and erythroid (RPK) pyruvate kinase proteins, expressed in liver and in red blood cells (RBCs)  
56 respectively. RPK is implicated in the last step of the anaerobic glycolysis pathway in RBCs.  
57 Glycolysis represents the main source of energy in RBCs. To date, more than 200 different  
58 mutations in the *PKLR* gene have been linked to PKD (1, 2). PKD-causing mutations lead to a  
59 partial or total reduction in the RPK activity and the concomitant reduction in ATP levels, which  
60 favors RBC hemolysis and the consequent anemia. The disease becomes clinically relevant when  
61 the protein activity decreases below 25% of the normal activity in erythrocytes (3). The most  
62 frequent clinical signs of the disease are mild to very severe anemia, reticulocytosis,  
63 splenomegaly and iron overload, implying that PKD might be life-threatening in severely affected  
64 patients (4). PKD is considered the most common cause of Chronic Non-spherocytic Hemolytic  
65 Anemia (CNSHA). It shows a worldwide geographical distribution and the majority of the  
66 diagnosed patients are compound heterozygotes, as homozygous mutations are rare but very  
67 severe (5). PKD is consider rare disease with an estimated prevalence of around 1:20,000(1)(6),  
68 and higher in certain populations, such as the Amish community, as a result of a founder effect  
69 (7, 8).

70 Treatments for PKD are mostly palliative and can help to improve the patient's quality of life.  
71 The most extended is red blood cells transfusions, which can be occasional or very frequent,  
72 depending on the condition of the patient (2). However, transfusions have related adverse  
73 effects, such as alloimmunization against donor blood cells and worsen of iron overload, which  
74 can result in important liver and heart organ damage (2, 9). Iron chelation treatments has  
75 improved, but not solved, this life-threatening condition in PKD patients (2). Spleen removal  
76 aims to prevent RBCs destruction, either reticulocytes or abnormal erythrocytes, and thus to  
77 increase the number of oxygen-transporting cells. Splenectomy does not arrest hemolysis but  
78 can increase hemoglobin (Hb) values up to 1-3 g/dL (2). However, this treatment implies a risk  
79 of serious bacterial infections and an increased risk of venous thrombosis. Moreover, around  
80 14% splenectomized PKD patients remain dependent on blood transfusion dependents after  
81 splenectomy. Currently, the only curative treatment for PKD is allogeneic hematopoietic stem  
82 cell transplantation (HSCT). However, it is not considered as routine treatment in PKD patients,  
83 due to the limitation of HLA compatible donors and the severe adverse effects, such as infections  
84 or development of graft-versus-host disease (GvHD), which can be particularly severe in PKD  
85 patients (10–12).

86 Autologous HSCT of genetically corrected cells could overcome these limitations. This strategy  
87 has been used in several hematological genetic diseases (13, 14), including hemoglobinopathies,  
88 (15–17)(18), being already approved for clinical application (Zynteglo;  
89 <http://shorturl.at/orMUU>). We have recently developed a lentiviral vector to genetically correct  
90 PKD (19), which has been granted orphan drug designation by the European and the American  
91 office regulators (EU/3/14/1330; FDA #DRU-2016-5168). This lentiviral-mediated gene therapy  
92 approach would offer a durable and curative clinical benefit with a single treatment, as shown  
93 by the preliminary results obtained in the first patient already infused with transduced  
94 autologous HSCs (NCT04105166) (20).

95 Despite the promising results of conventional gene therapy, the ideal gene therapy approach  
96 should lead to the specific correction of the mutated gene, maintaining the endogenous  
97 regulation and eliminating the integration of exogenous DNA material elsewhere. Nuclease  
98 driven gene editing has emerged to allow it. This technology can be used for conducting precise  
99 double strand breaks (DSBs) and homologous recombination in the genome increasing up to  
100 1000 times the previous efficacy of targeted modifications. A variety of genetic defects affecting  
101 non-hematopoietic tissues (22–24) and the hematopoietic system, such as X-linked SCID (25),  
102 SCD (26, 27), X-linked chronic granulomatous disease (X-CGD) (28, 29) or Fanconi anemia (30,  
103 31) among others, have been successfully attempted by gene editing. Moreover, gene editing is  
104 already showing promising clinical results, as recently shown in hemoglobinopathies (32–35).  
105 The improvement in the condition of two  $\beta$ -thalassemia and SCD patients enrolled in the  
106 CTX001<sup>®</sup> clinical trial (36), pave the way to consider gene editing as a promising approach for  
107 RBC disorders, such as PKD. Previous studies performed in our laboratory demonstrated that  
108 gene editing in *PKLR* locus mediated by nucleases is feasible in iPSCs (37) and in HSPCs (38),  
109 although the efficacy achieved was far from being clinically relevant. In this work, we have  
110 implemented the CRISPR/Cas9 nuclease system to induce DSBs at the transcription start site of  
111 *PKLR*, and recombinant adeno-associated vectors (rAAVs) to deliver a therapeutic DNA donor.  
112 We have been able to correct the phenotype of erythroid cells derived from PKD-HSPCs and to  
113 achieve clinically relevant levels of correction that envision the treatment of PKD patients by  
114 gene editing.

115 **RESULTS**

116 **Design of the CRISPR/Cas9–AAV6-donor-transfer system to target *PKLR* gene in Hematopoietic**  
117 **Stem and Progenitor Cells**

118 With the aim of developing a gene editing-based universal strategy for PKD patients, we  
119 followed a knock-in approach to insert a therapeutic donor at the translation start site of *PKLR*  
120 gene (Fig. S1 A and S2 A). To promote homologous directed repair (HDR) and favor integration  
121 of the therapeutic donor, we induced DSBs at *PKLR* transcription site by a specific CRISPR/Cas9  
122 ribonucleoprotein (RNP). Therapeutic donor was delivered into target cells by adeno-associated  
123 vectorization as previously described(26, 27, 39).

124 First, we designed different guide RNAs (gRNAs) to create DSBs around the start codon of the  
125 *PKLR* gene according to two main criteria, i) the highest on-target score possible (implying high  
126 specificity and less probable off-target [OT] activity) and, ii) the closest distance to *PKLR* starting  
127 site (Table S1). Efficacy of these gRNAs complexed with WT Sp. Cas9 protein (RNPs) was  
128 evaluated by TIDE assay in CB-CD34<sup>+</sup> cells (Fig. 1A). SG1 produced the higher frequency of indels  
129 at the on-target site in human cells from healthy-donors (62.7±14.2%, Fig. 1A). To analyze the  
130 off-target (OT) activity, these guides were transfected into HEK293 cells stably expressing Cas9,  
131 to force OT effect, which allowed a stringent detection of OT by GUIDE-seq analysis *in vivo* (40).  
132 OTs identified in this analysis are shown in Table S2. SG9 and SG10 presented reduced OT effect  
133 in comparison with the rest. Then, rhAmpSeq<sup>TM</sup> libraries were designed to analyze gene editing  
134 activity of the three most promising gRNAs, SG1 (the highest on-target activity in CB-CD34<sup>+</sup> cells)  
135 and SG9 and SG10 (the lowest OT activity). Total gene editing modification at on-target sites of  
136 SG1, SG9 and SG10 was analysed by rhAmpSeq<sup>TM</sup> with or without dsODN donor (Fig. 1B and Fig  
137 S1B). Additionally, RNP complexes formed by either WT Cas9 or HiFi Cas9 activity were also  
138 evaluated in order to reduce OT effect (27). SG1 gene editing activity without or with dsODN  
139 was higher than SG9 or SG10. Moreover, activity as RNP formed by HiFi Cas9 was not diminished  
140 (Fig 1B and Fig S1 B) that was confirmed by TIDE analyses (Fig. 1C). Lastly, OT effect of SG1 was  
141 analyzed through rhAmpSeq<sup>TM</sup> library of the top 49 OT sites in Jurkat cells (Fig. 1D). The  
142 percentage of gene modification in the most important OTs was reduced when HiFi Cas protein  
143 was used. In addition, a similar rhAmpSeq<sup>TM</sup> analysis was done in CB-CD34<sup>+</sup> cells (Fig. 1E). Gene  
144 editing of top ten OT sites in hCD34<sup>+</sup> cells were below 0.1% total gene editing when HiFi Cas9  
145 was used. Altogether, these analyses demonstrated that HiFi-Cas9/SG1-RNP promotes  
146 significant levels of perfect HDR in the on-target site, with a minimal effect in the potential off-  
147 targets, confirming the safety of the use of this RNP in the *PKLR* locus.

148 The design of the donor sequence to be packaged in AAV viral vector was conducted considering  
149 the selected SG1. Two donors were designed (Fig.S2 A), a reporter donor, carrying a turbo-GFP  
150 cDNA under the regulation of Ubiquitin C promoter (UBC) and a therapeutic donor, which carried  
151 the corrective sequence (coRPK cDNA), without any exogenous promoter, to allow the  
152 endogenous *PKLR* promoter to drive the expression of the therapeutic coRPK cDNA (see details  
153 in Materials and Methods). Donor sequences were flanked left and right homology arms, with  
154 AAV ITRs and packaged into AAV-6 serotype.

155

### 156 **Homology Directed Repair in the *PKLR* locus is effective in an erythroleukemic cell line and in** 157 **human hematopoietic progenitors**

158 Gene editing tools were validated in K562 human erythroleukemia cells. Cells were  
159 electroporated with the SG1-RNP and transduced with rAAVs carrying either the reporter or the  
160 therapeutic donor, at a viral concentration of  $1 \times 10^4$  genome copies per microliter (gc/ $\mu$ l). Cells  
161 transduced with the reporter donor were visualized by fluorescence microscopy 5 days post-  
162 transduction (dpt). Gene targeting efficiency of around 30% was estimated by  
163 immunofluorescence (Fig.S2 B). DNA from samples edited with the therapeutic vector was  
164 analyzed by specific PCRs amplifying the genomic junctions between the endogenous and  
165 exogenous DNA both at 5' and 3' ends to verify the correct integration of the transgene. Results  
166 confirmed the HDR of the therapeutic coRPK donor at the on-target site (Fig.S2 C-D).  
167 Furthermore, we quantified the expression of the endogenous RPK and therapeutic coRPK  
168 transcripts through qRT-PCR. Transduced and untransduced cells expressed the WT endogenous  
169 RPK mRNA (Fig. S2 E-F). However, coRPK transcripts were exclusively detected in K562 cells  
170 transduced with the therapeutic vector.

171 Next, we assessed the targeting efficiency in human HSPCs. CB-CD34<sup>+</sup> cells were nucleofected  
172 with *PKLR* SG1 RNP and then transduced with either of the two AAV donors. Forty-eight hours  
173 after nucleofection, clonogenic potential of edited cells was assessed in semisolid cultures by  
174 colony-forming units assay. No differences in the number or in the hematopoietic lineage  
175 distribution were found when cells were edited with either donor (Fig.2A). GFP<sup>+</sup> colonies  
176 visualized in colonies from CD34<sup>+</sup> cells transduced with the reporter donor (Fig.S3 A), reached  
177 values up to 38 % GFP<sup>+</sup> CFUs (21.1 $\pm$ 17.44%) (Fig.S3 B). Correct integration of the therapeutic  
178 donor was verified by PCR in individually picked colonies. In a representative agarose gel (Fig.2  
179 B), the specific 852bp (right arm) and 516bp (left arm) bands appeared in CFUs derived from  
180 edited CB-hCD34<sup>+</sup> cells. In addition, specific integration of the reporter donor was also confirmed  
181 by PCR in CFUs (Fig.S3 C). PCR amplicons of individual CFUs were Sanger sequenced and the

182 results confirmed the correct integration of the reporter and therapeutic donors in human  
183 progenitor cells (Fig.2 C and Fig. S 3D). In five different experiments, the percentage of positive  
184 colonies that displayed correct integration of the reporter and the therapeutic donor sequences  
185 in 5' end (LHA) and 3' end (RHA) was  $35.5\pm 4.7\%$  and  $38.5\pm 7.4\%$ , respectively (Fig.2 D).  
186 Altogether, results evidence the efficient knock-in of the desired donor at the starting site of  
187 *PKLR* gene in human hematopoietic progenitor cells.

188

### 189 ***PKLR* locus is efficiently targeted in long-term hematopoietic repopulating stem cells**

190 To test if the more primitive hematopoietic stem cells (HSCs) were also targeted using the  
191 described strategy, new CB-hCD34<sup>+</sup> cells from healthy donors were nucleofected with RNP-SG1  
192 and transduced with either reporter or therapeutic donor. Transduction efficiency assessed by  
193 flow cytometry 48hpt was 20% GFP<sup>+</sup> in CD34<sup>+</sup> cells. Within them, 5-10% of CD34<sup>+</sup>CD38<sup>-</sup>CD90<sup>+</sup>  
194 primitive HSCs were GFP<sup>+</sup> (Fig. 3A). To evaluate the editing efficiency in hematopoietic  
195 repopulating cells,  $8\times 10^5$ - $1\times 10^6$  edited cells were transplanted into sublethally irradiated  
196 immunodeficient NSG mice. The follow-up of human hematopoietic engraftment at 1 and 3  
197 months post-transplant demonstrated that gene edited cells were able to completely  
198 repopulate immunodeficient recipients (Fig. 3B). Ninety days post-transplant, mice transplanted  
199 with GFP-AAV edited cells reached  $87.27\pm 8.42\%$  human chimerism, and mice transplanted with  
200 coRPK-AAV edited cells presented similar levels ( $87.13\pm 5.86\%$ ) with no signs of toxicity related  
201 to the gene editing process when compared with laboratory historic data of transplants with  
202 non-manipulated cells (Fig. 3B). Percentage of GFP<sup>+</sup> cells within the human compartment in the  
203 BM of the recipients transplanted with cells transduced with the AAV reporter donor was  
204  $2.29\pm 1.89\%$  at 1mpt and  $0.34\pm 0.41\%$  at 3mpt (Fig. 3C and Fig. S4A). Percentage of GFP<sup>+</sup> cells  
205 within the hCD34<sup>+</sup> compartment analyzed 3mpt was  $2.2\pm 3.63\%$  (Fig.3 D). Multilineage  
206 differentiation in bone marrow cells was also investigated using antibodies against hCD34 for  
207 HSPCs, hCD33 for myeloid cells and hCD19 for lymphoid cells (Fig. 3E-F). Edited cells were found  
208 within the three human hematopoietic subpopulations (Fig. S4B), confirming the gene editing  
209 of the HSCs capable of generating myeloid, lymphoid and progenitor cells. To confirm the long-  
210 term repopulating capacity of edited cells, BM cells from primary recipient were transplanted  
211 into secondary recipients. FACS analyses of hCD45<sup>+</sup> cells in BM of secondary recipients showed  
212 that edited cells were able to efficiently repopulate secondary recipients. In the case of  
213 recipients infused with the GFP-edited cells  $16.87\pm 15.74\%$  of mouse cells were hCD45<sup>+</sup> cells, and  
214 a similar value of  $17.77\pm 12.60\%$  hCD45<sup>+</sup> cells was observed in the BM of secondary mice infused  
215 with cells edited with therapeutic donor. In all instance, a multilineage differentiation

216 engraftment was observed (Fig. 4A-C). Human CD45<sup>+</sup>GFP<sup>+</sup> and CD34<sup>+</sup>GFP<sup>+</sup> cells were detected in  
217 secondary recipients as well (Fig. 4D-E), and the percentage of GFP<sup>+</sup> cells within the human  
218 population was maintained along the time (3.27±5.66% total human cells and 0.82±1.41%  
219 human progenitor cells 3mpt). Human erythroid compartment, identified as mTer119<sup>+</sup>  
220 hCD235a<sup>+</sup>hCD71<sup>+</sup> was also analyzed. GFP<sup>+</sup> cells were found within the human erythroid  
221 population, and erythroid differentiation was not affected when the therapeutic donor was used  
222 (Fig. 4F-G). BM cells from secondary recipients, which were transplanted with HSCs edited with  
223 the SG1-RNP and the therapeutic donor, were analyzed by specific PCR, confirming the specific  
224 knock-in of the coRPK cDNA (Fig.4 H). Taken together, these results demonstrate the efficient  
225 knock-in gene editing protocol in HSCs capable of repopulating in the long term the  
226 hematopoiesis of immunodeficient NSG mice.

227

### 228 **Optimized gene targeting conditions in hCD34<sup>+</sup> cells allow clinically relevant efficacies**

229 Unpublished data with lentiviral vectors from our laboratory point-out that 25-30% corrected  
230 cells are necessary to observe a clinical improvement in PKD mouse model (S. Navarro et al,  
231 submitted). In order to assess the therapeutic potential of our gene editing system, we intended  
232 to maximize the efficacy of the transduction to reach the therapeutic limit. Doses of the reporter  
233 AAV ranging from 1x10<sup>1</sup> to 1x10<sup>5</sup>gc/μl were tested (Fig. 5A). Vector concentrations of 2.5x10<sup>4</sup>  
234 and 5x10<sup>4</sup>gc/μl displayed enhanced editing efficacies of 25.35±0.35% and 33.52±15.09% GFP<sup>+</sup>  
235 cells, respectively. Remarkably, 14.49±8.93% of the hCD34<sup>+</sup>hCD38<sup>+</sup>hCD90<sup>+</sup> cells were GFP<sup>+</sup> when  
236 samples were transduced with 5x10<sup>4</sup>gc/μl AAV (Fig. 5A and Fig. S5A). No significant differences  
237 in cell viability of the cell culture were observed when higher and more efficient viral vector  
238 concentrations were used (5x10<sup>4</sup>gc/μl) in comparison with previously used (1x10<sup>4</sup>gc/μl) (Fig. 5B).  
239 Gene targeting efficiency assessed in the BM of mice transplanted with edited cells was  
240 definitely increased when the higher AAV dose was used (20.38±11.76% in contrast with  
241 0.34±0.41% achieved with 10<sup>4</sup>gc/μl) (Fig. 5C). These data reveal that levels of gene editing  
242 obtained were in the range of those required to have clinical benefit to correct PKD.

### 243 **ATP deficiency is corrected after *PKLR* gene editing in PKD-HSPCs.**

244 Optimized editing conditions were then tested in BM-CD34<sup>+</sup> cells from three PKD patients and  
245 from mobilized PB-CD34<sup>+</sup> cells from 1 PKD patient, carrying different mutations in the *PKLR* gene  
246 (Table S4). Cells were pre-stimulated for 48 hours, nucleofected and then transduced with the  
247 rAAVs, or submitted to the same protocol without the gRNAs and the therapeutic rAAV. Healthy  
248 donor-CD34<sup>+</sup> cells were sham nucleofected and transduced as controls. Twenty-four hours after



249 the gene editing procedure, cells were collected and transferred to an *in vitro* erythroid  
250 differentiation protocol. Edited cells from one of the patient samples were transplanted into  
251 immunodeficient NBSGW mice to facilitate the analysis of human erythroid subpopulations.  
252 Sixty days after transplantation, levels of human hematopoietic chimerism were analyzed in  
253 mice BM. Both groups of mice (transplanted with mock or edited cells) showed high percentages  
254 of human engraftment ( $95.5\pm 1.11\%$  and  $89.98\pm 6.78\%$  hCD45<sup>+</sup> cells, respectively) (Fig. 5D) and  
255 no differences in the multilineage engraftment were observed between mock and edited cells  
256 (Fig. 5E-G). Specific integration of coRPK was assessed in pre-transplant samples, in *in vitro*  
257 erythroid differentiated samples and in the BM of the mice transplanted with mock or edited  
258 cells. In all cases, only edited cells showed the specific editing in 3' and 5' junctions (Fig. 6A).  
259 Expected bands were also found in hCD19<sup>+</sup> and hCD33<sup>+</sup> sorted populations from the  
260 transplanted NBSGW mice BM (Fig. S5 C), confirming that editing had occurred in multipotent  
261 HSCs. In parallel, erythroid differentiation process was evaluated along time by FACS. As shown  
262 in Fig S5 B, no significant differences between healthy and PKD donor samples were observed.  
263 In order to assess the percentage of gene targeting in the engrafted cells, we performed a CFU  
264 assay with sorted BM hCD34<sup>+</sup> cells. Up to 61 individual colonies from 5 different transplanted  
265 mice were analyzed. Among colonies positive for the GAPDH housekeeping PCR (51 colonies in  
266 total), 12 presented the expected integration of coRPK sequences both at 5' and 3' junctions,  
267 indicating an efficiency of  $25.24\pm 7.28\%$  HDR in PKD patient's HSCs (Fig. 6B). As expected, no  
268 colonies from mock edited colonies showed coRPK integration (Fig. 6B).

269 Finally, a functional analysis based in the quantification of ATP in *in vitro* differentiated erythroid  
270 cells was performed in the four edited samples. Unedited PKD cells or cells edited with the  
271 reporter vector produced low levels of ATP. However, erythroid cells that arise from PKD-CD34<sup>+</sup>  
272 cells that had undergone gene editing with the RNP and therapeutic donor were able to restore  
273 the ATP levels similarly to those determined by HD cells (Fig. 6C). Altogether, these results  
274 demonstrate the clinically relevant application of CRISPR/Cas9 and AAV-based gene editing to  
275 address the treatment of PKD patients.

276

## 277 **DISCUSSION**

278 PKD is nowadays considered a good candidate for gene therapy, supported by key factors, such  
279 as the monogenic origin of the disease and the confirmation of the efficacy of allogenic HSCT as  
280 a curative treatment for some PKD patients (12). Additionally, as initially reported by *García-*  
281 *Gómez et al (19)*, the correction of the *PKLR* gene defect by means of lentiviral-mediated gene

282 therapy is feasible and restores RPK functionality. In fact, an international multicentric clinical  
283 trial for the treatment of PKD patients is currently on-going (NCT04105166), and has already  
284 shown first evidences of therapeutic efficacy (20). Despite this promising therapy for PKD  
285 patients, the emergence of programmable nucleases has revolutionized the gene therapy field,  
286 making specific driven integration gene therapy an applicable clinical option (36). We have  
287 previously shown that gene editing in *PKLR* gene is achievable in iPSCs (37) and in HSPCs (38),  
288 showing correction of the PKD phenotype, although the achieved efficiencies were far from a  
289 potential clinical application(3, 19).

290 The feasibility of knocking-in a cDNA immediately after the start codon of the gene has been  
291 recently demonstrated (26, 42, 43). This approach allows the restoration of the specific gene  
292 functionality without compromising the endogenous regulatory control of the gene expression  
293 in all possible mutations affecting the open reading frame. In our case, this strategy would be  
294 applicable to most PKD patients, with the exception of the ones carrying mutations in the  
295 promoter or regulatory regions (only 1.1% of mutations happen to be in promoter sequences  
296 (9)). The developed system does not require selection. The genetic tools are easily designed and  
297 synthesized, and showed high levels of efficiency. The best RNP cutting in the start codon of  
298 *PKLR* gene was selected following two main criteria: the highest ON and lowest OT profiles. SG1-  
299 RNP produced DSBs above  $62.7 \pm 14.2\%$  in CB-hCD34<sup>+</sup> cells while maintaining its cleavage in the  
300 top 10 OTs under 0.1% assessed by GUIDE Seq, when *PKLR* SG1 guide RNA was complexed with  
301 HiFi Cas9, an engineered version of Sp.Cas9. To assess the safety of the designed *PKLR* guides,  
302 we have used a robust technique, such as GUIDE-seq, which ensures the safety of the *PKLR* SG1  
303 regarding its OT effect. This strict requirement of little OT activity is crucial when a multiclonal  
304 cell population is targeted for clinical uses, as it is the case for HSPCs gene therapy. Additionally,  
305 to deliver HDR donors, we selected the AAV6 platform, which is been widely used to edit human  
306 HSPCs. A therapeutic AAV6 donor carrying the coRPK cDNA and no promoter regions was  
307 synthesized (therapeutic donor). In parallel, a reporter donor was also generated, and both  
308 therapeutic and reporter donors' cDNA were diverged to prevent re-cutting of the SG1-RNP after  
309 gene editing has occurred. The combination of SG1-RNP and either therapeutic or reporter  
310 donor AAV6 boosted the efficacy of HDR at *PKLR* locus in human hematopoietic cells. No toxic  
311 effects linked to the protocol were found in CFUs, and indeed, when transduced with reporter  
312 donor,  $21.1 \pm 17.44\%$  CFUs were GFP<sup>+</sup> (Fig. S3B). Additionally,  $35.5 \pm 4.66\%$  and  $38.5 \pm 7.38\%$  of the  
313 CFUs presented the specific integration of the reporter donor or the therapeutic donor,  
314 respectively (Fig. 2D). The discrepancy between the fluorescence analyses and the molecular  
315 characterization could be attributed to differences in the sensitivity in the GFP<sup>+</sup> quantification,

316 since the monoallelic integration could minimize the fluorescence intensity. Furthermore, edited  
317 cells, when transplanted into immunodeficient mice, were able to repopulate very efficiently  
318 primary and secondary recipients (Fig.3-4). Although edited cells were able to give rise to  
319 different hematopoietic lineages, the percentage of gene editing within the human cells in mice  
320 was below 5% (Fig. 3C and Fig. 4D). Consequently, we attempted some optimizations of the  
321 protocol and we observed that increasing 5-fold the vector concentration allowed us to achieve  
322 higher percentages of gene editing with the reporter donor in CFUs and in xenotransplanted  
323 mice, without compromising human cell viability or stem potential (Fig. 5A-C). More  
324 importantly, when we applied these optimizations to PKD patients' HSPCs we observed that  
325 edited PKD-HSPCs were able to efficiently reconstitute the BM of NBSGW mice (Fig. 5D-G) and  
326 coRPK integration was observed in the mice transplanted with edited cells (Fig. 6A). We  
327 corroborated  $25.24 \pm 7.28\%$  HDR by specific in-out PCRs in hCD34<sup>+</sup> cells from the BM of  
328 transplanted mice (Fig. 6B), a value that is within the therapeutic window for PKD correction.  
329 Furthermore, after *in vitro* differentiating edited PKD-HSPCs towards the erythroid lineage, we  
330 observed a restoration in the functionality of RPK protein to almost healthy levels, measured by  
331 ATP production in four different patients (Fig. 6C).

332 This knock-in strategy represents the most promising gene editing approach in *PKLR* gene so far.  
333 It works both *in vitro* and *in vivo*. Optimizations in pre-stimulation time and vector concentration  
334 have improved the outcome of the protocol, but transduction efficiency in the most primitive  
335 compartment (HSCs) is still in the limits of the therapeutic application. We have considered the  
336 use of different editing enhancers, such as small molecules or specific microRNAs, to enhance  
337 the knock-in in HSPCs. In previous gene editing experiments focused on the knock-in in the  
338 second intron of the gene (38), dimethyl prostaglandin E2 did not enhance the procedure, but it  
339 may be worth testing it in this non-selection system since it was reported to enhance gene  
340 editing in engraftable HSCs in similar contexts (25). Besides, other molecules such as Scr7 have  
341 been shown to affect NHEJ pathway by the inhibition of DNA ligase IV, a key enzyme for this  
342 pathway. Thus, the downregulation of NHEJ increased the efficiency of HDR in mammalian cells  
343 (44, 45). Other groups have reported the use of SR-1 molecule as an HDR pathway enhancer in  
344 TALEN and CRISPR/Cas9-mediated editing systems (46). Aside from small molecules, it has been  
345 recently reported that inhibition of p53 increases the rate of HDR (47). Furthermore, *Schirolli et al*  
346 *al* reported that AAV6-mediated gene editing aggravates p53 activation and delays HSPCs  
347 proliferation (39), which can explain our limited levels of HDR in long-term HSCs. They also  
348 claimed that transient p53 inhibition (during the first 24 hours post-editing) alleviated  
349 repopulating defects in edited HSPCs and did not lead to any chromosomal aberrations. Either

350 way, inhibiting p53 is a risky approach, since it is widely known that stable inactivation of p53  
351 pathway can lead to development of malignancies. However, a recent study in mice reported no  
352 increases in mutational load upon stable p53 genetic inactivation in HSCs (48), opening the door  
353 to the possible regulation of p53 during the gene editing procedure in order to increase the yield  
354 of edited HSPCs that could engraft in patients and ensure rapid establishment of therapeutic  
355 benefit.

356 In summary, the present study demonstrates that a gene editing approach based on RNP  
357 electroporation and donor rAAV transduction in PKD HSCs is safe and efficient to correct PKD.  
358 Moreover, the levels of HSPCs-gene editing achieved with the proposed strategy are in the range  
359 required to be of clinically relevance for the treatment of PKD patients.

360

## 361 **MATERIALS AND METHODS**

362

### 363 **Human cells**

364 K562 cell line (chronic myelogenous leukemia; ATCC: CCL-243) was cultured in Iscove's modified  
365 Dulbecco's medium (IMDM; Gibco), 20% HyClone™ Fetal Bovine Serum (FBS, GE Healthcare)  
366 and 1% penicillin/streptomycin (P/S) solution (Gibco). Cells were maintained at  $5 \times 10^5$ - $1 \times 10^6$   
367 cell/mL.

368 Umbilical cord blood samples (CB) from healthy donors were provided by *Centro de*  
369 *Transfusiones de la Comunidad de Madrid* and samples from PKD patients were provided by  
370 *Hospital Universitario Fundación Jiménez Díaz*, *Hospital Infantil Universitario Niño Jesús* and  
371 *Ospedale Maggiore Policlinico*. All samples were collected under written consent from the  
372 donors and *Centro de Transfusiones de la Comunidad de Madrid's* institutional review board  
373 agreement (number PKDefin [SAF2017-84248-P]). Mononuclear cells were obtained by Ficoll-  
374 Paque PLUS (GE Healthcare) density gradient isolation according to manufacturer's  
375 recommendations. Purified CD34<sup>+</sup> cells were obtained by immunoselection using the CD34  
376 Micro-Bead kit (MACS, Miltenyi Biotech). Magnetically-labelled cells were selected with LS and  
377 MS columns sequentially in QuadroMACSTM Separator (Miltenyi Biotech) following  
378 manufacturer's instructions. Purified cells were kept frozen or used fresh in further experiments.

379 Cells were grown in StemSpan (StemCell Technologies) supplemented with 0.5% P/S, 100 ng/ml  
380 human Stem Cell Factor (SCF), 100 ng/ml human thrombopoietin (TPO), 100 ng/ml human FMS-  
381 like tyrosine kinase 3 ligand (Flt3), 100ng/ml human interleukin 6 (hIL-6) (all obtained from

382 EuroBiosciences) and 35nM UM171 molecule (Stem Cell Technologies). Cells were cultured  
383 under normoxic conditions: 37°C, 21% O<sub>2</sub>, 5% CO<sub>2</sub> and 95% relative humidity.

384

### 385 **Guide RNAs**

386 The design of the different guide RNAs to introduce DSBs in the genomic sites of interest was  
387 performed using the different website tools available for that purpose, such as Dr. Zhang's lab  
388 tool (<https://zlab.bio/guide-design-resources>) or Integrated DNA Technologies (IDT) website  
389 ([https://eu.idtdna.com/site/order/designtool/index/CRISPR\\_SEQUENCE](https://eu.idtdna.com/site/order/designtool/index/CRISPR_SEQUENCE)).

390 Additionally, the activity of the designed guide was assessed through calculating the insertion-  
391 deletion (Indel) frequencies using the TIDE software (<https://tide.deskgen.com/>). PCR of  
392 genomic DNA extracted 3 days after nucleofection using NucleoSpin Tissue kit (Macherey-Nagel)  
393 was performed using specific primers and Sanger sequenced (Stabvida, Caparica, Portugal).  
394 Unedited cells were always used as a negative control for calculating INDEL frequencies with  
395 TIDE. Sanger sequencing was done with ATG TIDE F 5'- CCTGCTCCCTGGATCACTA-3' and ATG  
396 TIDE R 5'-TTTAACACACGGGAGGCTCT-3' primers.

397

### 398 **rAAV/Cas9 gene editing**

399 To assemble ribonucleoproteins (RNP), 6µg Alt-R® S.p. Cas9 Nuclease V3 (IDT) was combined  
400 with 3.2µg synthetic sgRNAs (Synthego) at RT for 10 min immediately prior to be used.

401 Human K562 cells were nucleofected with already complexed RNP using the SF Cell Line 4D  
402 Nucleofector X Kit for Amaxa 4D device (Lonza, Basel) with program FF-120. After the pulse,  
403 nucleofected cells were incubated for 10 minutes at 37°C and collected in a final volume of 200µl  
404 medium in a 96-well cell culture plate.

405 For the nucleofection of RNP into healthy donor (HD) or PKD-CD34<sup>+</sup> cells, P3 Primary Cell 4D  
406 Nucleofector X Kit for Amaxa 4D device (Lonza, Basel, Switzerland) was used. Two hundred  
407 thousand cells were pre-stimulated for 24h or 48h and then resuspended in 20µl of  
408 nucleofection solution. RNP complex was added into the cellular suspension. The cells were  
409 nucleofected using DZ-100 program in strips. After the pulse, nucleofected HSPCs were  
410 incubated for 10 minutes at 37°C. Then, 180µl of pre-warmed medium was added and cells were  
411 transferred to a 96-well cell culture plate.

412 Nucleofected cells were immediately transduced with the corresponding AAV at different  
413 concentrations ranging from  $10^4$  to  $10^5$ gc/ $\mu$ l in a 96-well culture plate in a final volume of 200  
414  $\mu$ L. Twenty-four hours after transduction, 100 $\mu$ l pre-warmed medium was added.

415 Gene editing in Jurkat cells was performed by transfection of RNP using the Nucleofector system  
416 (Lonza, Basel) as described previously (49). In short, 5E5 cells were electroporated with RNPs  
417 using either Alt-R<sup>®</sup> S.p. Cas9 Nuclease V3 (IDT) or Alt-R<sup>®</sup> S.p. HiFi Cas9 Nuclease V3 at a  
418 concentration of 4  $\mu$ M in the presence of 4.8  $\mu$ M Alt-R<sup>®</sup> Cas9 Electroporation Enhancer (IDT).  
419 RNPs were generated by combining Cas9 and guideRNA complexes at a ratio of 1:1.2. GuideRNA  
420 complexes were generated by mixing Alt-R<sup>®</sup> CRISPR-Cas9 crRNA and Alt-R<sup>®</sup>CRISPR-Cas9  
421 tracrRNA in equimolar amounts, followed by incubation for 5 minutes at 95°C and cooling to  
422 room temperature.

423

#### 424 **Hematopoietic transplant protocol in immunodeficient mice**

425 All the mice were kept under standard pathogen-free conditions in the animal facility of CIEMAT.  
426 All animal experiments were performed in compliance with European and Spanish legislations  
427 and institutional guidelines. The protocol was approved by “*Consejería de Medio Ambiente y*  
428 *Ordenación del Territorio*” (Protocol number PROEX 073/15).

429 Human CD34<sup>+</sup> cells were administered through tail vein of female NOD.Cg-Prkdc<sup>scid</sup> Il2rg<sup>tm1Wjl</sup>/SzJ  
430 (NSG) or NOD.Cg-Kit<sup>W-41J</sup>Tyr<sup>+</sup>Prkdc<sup>scid</sup>Il2rg<sup>tm1Wjl</sup>/ThomJ (NBSGW) mice sub-lethally irradiated the  
431 day before transplant with 1.5Gy or 1Gy respectively. Together with these cells,  $1 \times 10^6$  irradiated  
432 with 20Gy hCD34<sup>-</sup> cells (collected from the negative fraction of the CD34<sup>+</sup> purification) were  
433 transplanted as support population. At day 30 after transplantation, bone marrow samples were  
434 obtained by intra-bone aspiration. NSG or NBSGW animals were euthanized at days 90 post-  
435 transplant or 60 post-transplant respectively. BM samples were collected and stained to analyze  
436 the percentage of gene-targeted cells.

437 To evaluate the long-term engraftment capacity of hCD34<sup>+</sup> after AAV-mediated gene editing,  
438 the bone marrow cells extracted from primary NSG mice were transplanted into secondary NSG  
439 recipients. The human engraftment follow-up in secondary recipients was conducted as  
440 previously described, at 30 and 90 days post-transplantation.

441

#### 442 **Flow Cytometry analysis**

443 Flow cytometry analyses were conducted in LSR Fortessa Cell Analyser (BD/Becton Dickinson).  
444 Off-line analysis was made with FlowJo Software v10.5.0 (Tree Star).

445 To study the human HSPC phenotype of the gene edited cells were stained with hCD34-Pecy7  
446 (581 clone, Biolegend), hCD38-PE (HB7 clone, BD) and hCD90-APC (5E10 clone, BD). After  
447 labelling, cells were washed and suspended in flow cytometry buffer containing 1µg/ml 4',6-  
448 diamidino-2-phenylindole (DAPI, Thermo Fisher Scientific).

449 Human hematopoietic reconstitution in transplanted mice was analyzed by determining the  
450 percentage of progenitor cells (hCD34<sup>+</sup>), myeloid cells (hCD33<sup>+</sup>) and lymphoid cells (hCD19<sup>+</sup>) in  
451 the total engrafted human population subset (hCD45<sup>+</sup>). The BM cells were stained with hCD45-  
452 APCCy7 (HI30 clone, Biolegend), hCD34-APC (581 clone, BD), hCD19-PeCy7 (SL25C1 clone,  
453 Biolegend) and hCD33-PE (D3HL60.251 clone, Beckman Coulter). Afterwards, cells were washed  
454 and suspended in flow cytometry buffer containing 1µg/ml DAPI. Additionally, to assess human  
455 erythroid population within mouse BM, cells were stained with mTer119-FITC (TER119 clone,  
456 BioLegend), hCD235a-PE (HIR2 clone, BD) and hCD71-Pecy5 (M-A712 clone, BD) and suspended  
457 in flow cytometry buffer containing 1µg/ml DAPI.

458

#### 459 **Genome targeting and quantification**

460 To analyze the frequency of gene editing in HSPCs, specific integration of any of the two donors  
461 was assessed in colony forming units (CFUs). Two days after gene editing protocol, hCD34<sup>+</sup> cells  
462 were resuspended in enriched methylcellulose medium (StemMACS™ HSC-CFU complete with  
463 Epo, Miltenyi Biotec). Fourteen days afterwards, colonies were counted and CFUs-GMs  
464 (granulocyte-macrophage colony forming units), BFU-Es (erythroid burst forming units) and  
465 CFU-GEMMs (granulocyte-erythroid-macrophage-megakaryocyte colony forming units) were  
466 identified and scored based on their morphological appearance in a blinded fashion. Individual  
467 colonies were picked in 100µl PBS. Genomic DNA from colonies was extracted by adding 20 µl  
468 of lysis buffer (0.3 mM Tris HCl pH 7.5, 0.6 mM CaCl<sub>2</sub>, 1,5 % Glycerol , 0.675 % Tween-20 and 0.3  
469 mg/ml Proteinase K) and incubated at 65°C for 30 min, 90°C for 10 min and 4°C. After lysis, 30  
470 µl of water were added, as previously described in Charrier et al (50). Specific *in* and *out* primers  
471 [donorGFP-LHA/RHA and donorRPK-LHA/RHA] (see TableS5) were designed to amplify the  
472 regions of junction between the endogenous and exogenous DNA as shown in Figure S2 C. To  
473 assess the perfect insertion of the donor matrix, an in-out PCR was performed with Herculase II  
474 Fusion High-Fidelity DNA Polymerase (Agilent Technologies). The specific size of the PCR  
475 products was verified in 1% agarose gel. To analyze gene editing levels in cells engrafted in

476 immunodeficient mice or erythroid differentiation experiments, cell DNA was purified using  
477 DNeasy Blood & Tissue Kit (QIAGEN) and the previously described in-out PCR strategy was  
478 performed.

479

#### 480 **Expression analysis**

481 The expression of coRPK mRNA was done by quantitative real time PCR (qRT-PCR). Firstly, mRNA  
482 from the edited cells was purified using TRIzol RNA Isolation kit (Thermo Fisher Scientific)  
483 according manufacturer's instructions. The RNA was retrotranscribed to cDNA using the  
484 SuperScript VILO cDNA Synthesis Kit (Thermo Fisher Scientific). Finally, the cDNA was submitted  
485 to qRT-PCR using 7500 Fast Real-Time device and the Fast SYBR Green Master Mix (Applied  
486 Biosystems, Thermo Fisher Scientific). The primers for the amplification of the coRPK sequence  
487 were the following: coRPK F 5'-GGTGGTGCAGAAGATCGGAC-3' and coRPK R 5'-  
488 GCAGATTCACGCCCTTCTG-3'. GAPDH was used as housekeeping gene, and the quantification  
489 was done by comparison of the expression value of the transgene with the expression value of  
490 the GAPDH. The relative expression to GAPDH was calculated according Pfaffl's method(51).  
491 Additionally, the specific size of the PCR products was verified in 2% agarose gel.

492

#### 493 **ATP quantification**

494 To quantify ATP production, CellTiter-Glo® Luminescent Cell Viability Assay (Promega) was used.  
495 Human erythroid cells were plated in an opaque-walled 96-well plate. Control wells were  
496 prepared containing medium without cells to obtain a value for background luminescence. Then,  
497 the plate was equilibrated and incubated at room temperature for approximately 30 minutes.  
498 Afterwards, a volume of CellTiter-Glo® reagent equal to the volume of cell culture medium  
499 present in each well was added and cell solution was mixed for 2 minutes on an orbital shaker  
500 to induce cell lysis. In order to stabilize luminescent signal the plate was incubated at room  
501 temperature for 10 minutes. Finally, luminescence can be recorded using Genios Pro reader  
502 (Tecan).

503

#### 504 **DATA AVAILABILITY**

505 This study includes no data deposited in external repositories

506



507 **REFERENCES**

- 508 1. G. Canu, M. De Bonis, A. Minucci, E. Capoluongo, Red blood cell PK deficiency: An update of  
509 PK-LR gene mutation database, *Blood Cells, Mol. Dis.* **57**, 100–109 (2016).
- 510 2. R. F. Grace, P. Bianchi, E. J. van Beers, S. W. Eber, B. Glader, H. M. Yaish, J. M. Despotovic, J.  
511 A. Rothman, M. Sharma, M. M. McNaull, E. Fermo, K. Lezon-Geyda, D. H. Morton, E. J. Neufeld,  
512 S. Chonat, N. Kollmar, C. M. Knoll, K. Kuo, J. L. Kwiatkowski, D. Pospíšilová, Y. D. Pastore, A. A.  
513 Thompson, P. E. Newburger, Y. Ravindranath, W. C. Wang, M. W. Wlodarski, H. Wang, S.  
514 Holzhauser, V. R. Breakey, J. Kunz, S. Sheth, M. J. Rose, H. A. Bradeen, N. Neu, D. Guo, H. Al-  
515 Sayegh, W. B. London, P. G. Gallagher, A. Zanella, W. Barcellini, Clinical spectrum of pyruvate  
516 kinase deficiency: Data from the pyruvate kinase deficiency natural history study, *Blood* **131**,  
517 2183–2192 (2018).
- 518 3. N. W. Meza, M. E. Alonso-Ferrero, S. Navarro, O. Quintana-Bustamante, A. Valeri, M. Garcia-  
519 Gomez, J. A. Bueren, J. M. Bautista, J. C. Segovia, Rescue of pyruvate kinase deficiency in mice  
520 by gene therapy using the human isoenzyme, *Mol. Ther.* **17**, 2000–2009 (2009).
- 521 4. R. F. Grace, W. Barcellini, Management of pyruvate kinase deficiency in children and adults,  
522 *Blood* **136**, 1241–1249 (2020).
- 523 5. R. Van Wijk, E. G. Huizinga, A. C. W. Van Wesel, B. A. Van Oirschot, M. A. Hadders, W. W.  
524 Van Solinge, Fifteen novel mutations in PKLR associated with pyruvate kinase (PK) deficiency:  
525 Structural implications of amino acid substitutions in PK, *Hum. Mutat.* **30**, 446–453 (2009).
- 526 6. R. F. Grace, A. Zanella, E. J. Neufeld, D. H. Morton, S. Eber, H. Yaish, B. Glader, Erythrocyte  
527 pyruvate kinase deficiency: 2015 status report, *Am. J. Hematol.* **90**, 825–830 (2015).
- 528 7. R. D. Christensen, L. D. Eggert, V. L. Baer, K. N. Smith, Pyruvate kinase deficiency as a cause  
529 of extreme hyperbilirubinemia in neonates from a polygamist community, *J. Perinatol.* **30**,  
530 233–236 (2010).
- 531 8. W. A. Muir, E. Beutler, C. Wasson, Erythrocyte pyruvate kinase deficiency in the Ohio Amish:  
532 Origin and characterization of the mutant enzyme, *Am. J. Hum. Genet.* **36**, 634–639 (1984).
- 533 9. A. Zanella, E. Fermo, P. Bianchi, L. R. Chiarelli, G. Valentini, Pyruvate kinase deficiency: The  
534 genotype-phenotype association, *Blood Rev.* **21**, 217–231 (2007).
- 535 10. I. Henig, T. Zuckerman, Hematopoietic Stem Cell Transplantation—50 Years of Evolution  
536 and Future Perspectives, *Rambam Maimonides Med. J.* **5**, e0028 (2014).

- 537 11. S. E. Smetsers, F. J. Smiers, D. Bresters, M. C. Sonneveld, M. B. Bierings, Four decades of  
538 stem cell transplantation for Fanconi anaemia in the Netherlands, *Br. J. Haematol.* **174**, 952–  
539 961 (2016).
- 540 12. van W. R. van Straaten S, Bierings M, Bianchi P, Akiyoshi K, Kanno H, Serra IB, Chen J,  
541 Huang X, van Beers E, Ekwattanakit S, Güngör T Kors WA, Smiers F, Raymakers R, Yanez L,  
542 Sevilla J, van Solinge W, Segovia JC, Worldwide study of hematopoietic allogeneic stem cell  
543 transplantation in pyruvate kinase deficiency, (2018).
- 544 13. C. E. Dunbar, K. A. High, J. K. Joung, D. B. Kohn, K. Ozawa, M. Sadelain, REVIEW SUMMARY  
545 Gene therapy comes of age, *Science* **359**, eaan4672 (2018).
- 546 14. J. A. Bueren, O. Quintana-Bustamante, E. Almarza, S. Navarro, P. Río, J. C. Segovia, G.  
547 Guenechea, Advances in the gene therapy of monogenic blood cell diseases, *Clin. Genet.* **97**,  
548 89–102 (2020).
- 549 15. A. A. Thompson, M. C. Walters, J. Kwiatkowski, J. E. J. Rasko, J. A. Ribeil, S. Hongeng, E.  
550 Magrin, G. J. Schiller, E. Payen, M. Semeraro, D. Moshous, F. Lefrere, H. Puy, P. Bourget, A.  
551 Magnani, L. Caccavelli, J. S. Diana, F. Suarez, F. Monpoux, V. Brousse, C. Poirot, C. Brouzes, J. F.  
552 Meritet, C. Pondarré, Y. Beuzard, S. Chrétien, T. Lefebvre, D. T. Teachey, U. Anurathapan, P. J.  
553 Ho, C. Von Kalle, M. Kletzel, E. Vichinsky, S. Soni, G. Veres, O. Negre, R. W. Ross, D. Davidson, A.  
554 Petrusich, L. Sandler, M. Asmal, O. Hermine, M. De Montalembert, S. Hacein-Bey-Abina, S.  
555 Blanche, P. Leboulch, M. Cavazzana, Gene therapy in patients with transfusion-dependent  $\beta$ -  
556 thalassemia, *N. Engl. J. Med.* **378**, 1479–1493 (2018).
- 557 16. and P. L. Marina Cavazzana-Calvo, Emmanuel Payen, Olivier Negre, Gary Wang, Kathleen  
558 Hehir, Floriane Fusil, Julian Down, Maria Denaro, Troy Brady, Karen Westerman, Resy  
559 Cavallesco, Beatrix Gillet-Legrand, Laure Caccavelli, Riccardo Sgarra, Leila Maouche-Chrétien, F,  
560 Transfusion independence and HMGA2 activation after gene therapy of human  $\beta$ -  
561 thalassaemia, **46**, 564–574 (2011).
- 562 17. S. Markt, S. Scaramuzza, M. P. Cicalese, F. Giglio, S. Galimberti, M. R. Lidonnici, V. Calbi, A.  
563 Assanelli, M. E. Bernardo, C. Rossi, A. Calabria, R. Milani, S. Gattillo, F. Benedicenti, G. Spinuzzi,  
564 A. Aprile, A. Bergami, M. Casiraghi, G. Consiglieri, N. Masera, E. D'Angelo, N. Mirra, R. Origa, I.  
565 Tartaglione, S. Perrotta, R. Winter, M. Coppola, G. Viarengo, L. Santoleri, G. Graziadei, M.  
566 Gabaldo, M. G. Valsecchi, E. Montini, L. Naldini, M. D. Cappellini, F. Ciceri, A. Aiuti, G. Ferrari,  
567 Intrabone hematopoietic stem cell gene therapy for adult and pediatric patients affected by  
568 transfusion-dependent  $\beta$ -thalassemia, *Nat. Med.* **25**, 234–241 (2019).

- 569 18. J. A. Ribeil, S. Hacein-Bey-Abina, E. Payen, A. Magnani, M. Semeraro, E. Magrin, L.  
570 Caccavelli, B. Neven, P. Bourget, W. El Nemer, P. Bartolucci, L. Weber, H. Puy, J. F. Meritet, D.  
571 Grevent, Y. Beuzard, S. Chrétien, T. Lefebvre, R. W. Ross, O. Negre, G. Veres, L. Sandler, S. Soni,  
572 M. De Montalembert, S. Blanche, P. Leboulch, M. Cavazzana, Gene therapy in a patient with  
573 sickle cell disease, *N. Engl. J. Med.* **376**, 848–855 (2017).
- 574 19. M. Garcia-Gomez, A. Calabria, M. Garcia-Bravo, F. Benedicenti, P. Kosinski, S. López-  
575 Manzaneda, C. Hill, M. Del Mar Mau-Pereira, M. A. Martín, I. Orman, J. L. Vives-Corrons, C.  
576 Kung, A. Schambach, S. Jin, J. A. Bueren, E. Montini, S. Navarro, J. C. Segovia, Safe and efficient  
577 gene therapy for pyruvate kinase deficiency, *Mol. Ther.* **24**, 1187–1198 (2016).
- 578 20. J. L. López Lorenzo, S. Navarro, A. J. Shah, M. G. Roncarolo, J. Sevilla, L. Llanos, B. Pérez  
579 Camino de Gaisse, S. Sanchez, B. Glader, M. Chien, O. Quintana Bustamante, B. C. Beard, K. M.  
580 Law, M. Zeini, G. Choi, E. Nicoletti, J. A. Bueren, G. R. Rao, J. D. Schwartz, J. C. Segovia,  
581 Lentiviral Mediated Gene Therapy for Pyruvate Kinase Deficiency: A Global Phase 1 Study for  
582 Adult and Pediatric Patients, *Blood* **136**, 47 (2020).
- 583 21. M. Jasin, Genetic manipulation of genomes with rare-cutting endonucleases, *Trends Genet.*  
584 **12**, 224–228 (1996).
- 585 22. J. Bonafont, Á. Mencía, M. García, R. Torres, S. Rodríguez, M. Carretero, E. Chacón-Solano,  
586 S. Modamio-Høybjør, L. Marinas, C. León, M. J. Escamez, I. Hausser, M. Del Río, R. Murillas, F.  
587 Larcher, Clinically Relevant Correction of Recessive Dystrophic Epidermolysis Bullosa by Dual  
588 sgRNA CRISPR/Cas9-Mediated Gene Editing, *Mol. Ther.* **27**, 986–998 (2019).
- 589 23. N. Zabaleta, M. Barberia, C. Martin-Higueras, N. Zapata-Linares, I. Betancor, S. Rodriguez,  
590 R. Martinez-Turrillas, L. Torella, A. Vales, C. Olagüe, A. Vilas-Zornoza, L. Castro-Labrador, D.  
591 Lara-Astiaso, F. Prosper, E. Salido, G. Gonzalez-Aseguinolaza, J. R. Rodriguez-Madoz,  
592 CRISPR/Cas9-mediated glycolate oxidase disruption is an efficacious and safe treatment for  
593 primary hyperoxaluria type I, *Nat. Commun.* **9**, 1–9 (2018).
- 594 24. N. E. Bengtsson, J. K. Hall, G. L. Odom, M. P. Phelps, C. R. Andrus, R. D. Hawkins, S. D.  
595 Hauschka, J. R. Chamberlain, J. S. Chamberlain, Muscle-specific CRISPR/Cas9 dystrophin gene  
596 editing ameliorates pathophysiology in a mouse model for Duchenne muscular dystrophy, *Nat.*  
597 *Commun.* **8**, 1–9 (2017).
- 598 25. P. Genovese, G. Schioli, G. Escobar, T. Di Tomaso, C. Firrito, A. Calabria, D. Moi, R.  
599 Mazzieri, C. Bonini, M. C. Holmes, P. D. Gregory, M. Van Der Burg, B. Gentner, E. Montini, A.  
600 Lombardo, L. Naldini, Targeted genome editing in human repopulating haematopoietic stem

- 601 cells, *Nature* **510**, 235–240 (2014).
- 602 26. D. P. Dever, R. O. Bak, A. Reinisch, J. Camarena, G. Washington, C. E. Nicolas, M. Pavel-  
603 Dinu, N. Saxena, A. B. Wilkens, S. Mantri, N. Uchida, A. Hendel, A. Narla, R. Majeti, K. I.  
604 Weinberg, M. H. Porteus, CRISPR/Cas9  $\beta$ -globin gene targeting in human haematopoietic stem  
605 cells, *Nature* **539**, 384–389 (2016).
- 606 27. C. A. Vakulskas, D. P. Dever, G. R. Rettig, R. Turk, A. M. Jacobi, M. A. Collingwood, N. M.  
607 Bode, M. S. McNeill, S. Yan, J. Camarena, C. M. Lee, S. H. Park, V. Wiebking, R. O. Bak, N.  
608 Gomez-Ospina, M. Pavel-Dinu, W. Sun, G. Bao, M. H. Porteus, M. A. Behlke, A high-fidelity Cas9  
609 mutant delivered as a ribonucleoprotein complex enables efficient gene editing in human  
610 hematopoietic stem and progenitor cells, *Nat. Med.* **24**, 1216–1224 (2018).
- 611 28. S. S. De Ravin, L. Li, X. Wu, U. Choi, C. Allen, S. Koontz, J. Lee, N. Theobald-Whiting, J. Chu,  
612 M. Garofalo, C. Sweeney, L. Kardava, S. Moir, A. Viley, P. Natarajan, L. Su, D. Kuhns, K. A.  
613 Zarembler, M. V. Peshwa, H. L. Malech, CRISPR-Cas9 gene repair of hematopoietic stem cells  
614 from patients with X-linked chronic granulomatous disease, *Sci. Transl. Med.* **9** (2017),  
615 doi:10.1126/scitranslmed.aah3480.
- 616 29. and H. L. M. Suk See De Ravin, Andreas Reik, Pei-Qi Liu, Linhong Li, Xiaolin Wu, Ling Su,  
617 Castle Raley, Narda Theobald, Uimook Choi, Alexander H. Song, Andy Chan, Jocelynn R. Pearl,  
618 David E. Paschon, Janet Lee, Hannah Newcombe, Sherry Koontz, Colin Sweeney, David A. S,  
619 Targeted Gene Addition to a Safe Harbor locus in human CD34+ Hematopoietic Stem Cells for  
620 Correction of X-linked Chronic Granulomatous Disease, *Nat. Biotechnol* **88**, 424–429 (2016).
- 621 30. B. Diez, P. Genovese, F. J. Roman-Rodriguez, L. Alvarez, G. Schirotli, L. Ugalde, S. Rodriguez-  
622 Perales, J. Sevilla, C. Diaz de Heredia, M. C. Holmes, A. Lombardo, L. Naldini, J. A. Bueren, P.  
623 Rio, Therapeutic gene editing in CD34<sup>+</sup> hematopoietic progenitors from Fanconi anemia  
624 patients, *EMBO Mol. Med.* **9**, 1574–1588 (2017).
- 625 31. P. Rio, R. Baños, A. Lombardo, O. Quintana-Bustamante, L. Alvarez, Z. Garate, P. Genovese,  
626 E. Almarza, A. Valeri, B. Díez, S. Navarro, Y. Torres, J. P. J. P. Trujillo, R. Murillas, J. C. J. C.  
627 Segovia, E. Samper, J. Surralles, P. D. P. D. Gregory, M. C. Holmes, L. Naldini, J. A. Bueren, O.  
628 Quintana-Bustamante, L. Alvarez, Z. Garate, P. Genovese, E. Almarza, A. Valeri, B. Díez, S.  
629 Navarro, Y. Torres, J. P. J. P. Trujillo, R. Murillas, J. C. J. C. Segovia, E. Samper, J. Surralles, P. D.  
630 P. D. Gregory, M. C. Holmes, L. Naldini, J. A. Bueren, Targeted gene therapy and cell  
631 reprogramming in Fanconi anemia, *EMBO Mol. Med.* **6**, 835–848 (2014).
- 632 32. D. E. Bauer, S. C. Kamran, S. Lessard, J. Xu, Y. Fujiwara, C. Lin, Z. Shao, M. C. Canver, E. C.

- 633 Smith, L. Pinello, J. Peter, J. Vierstra, R. A. Voit, G. Yuan, M. H. Porteus, A. John, G. Lettre, S. H.  
634 Orkin, A erythroid enhancer of BCL11A subject t genetic variation, **342**, 253–257 (2014).
- 635 33. K. H. Chang, S. E. Smith, T. Sullivan, K. Chen, Q. Zhou, J. A. West, M. Liu, Y. Liu, B. F. Vieira,  
636 C. Sun, V. P. Hong, M. Zhang, X. Yang, A. Reik, F. D. Urnov, E. J. Rebar, M. C. Holmes, O. Danos,  
637 H. Jiang, S. Tan, Long-Term Engraftment and Fetal Globin Induction upon BCL11A Gene Editing  
638 in Bone-Marrow-Derived CD34+ Hematopoietic Stem and Progenitor Cells, *Mol. Ther. -*  
639 *Methods Clin. Dev.* **4**, 137–148 (2017).
- 640 34. N. Psatha, A. Reik, S. Phelps, Y. Zhou, D. Dalas, E. Yannaki, D. N. Levasseur, F. D. Urnov, M.  
641 C. Holmes, T. Papayannopoulou, Disruption of the BCL11A Erythroid Enhancer Reactivates  
642 Fetal Hemoglobin in Erythroid Cells of Patients with  $\beta$ -Thalassemia Major, *Mol. Ther. - Methods*  
643 *Clin. Dev.* **10**, 313–326 (2018).
- 644 35. Y. Wu, J. Zeng, B. P. Roscoe, P. Liu, Q. Yao, R. Lazzarotto, M. K. Clement, M. A. Cole, K. Luk,  
645 C. Baricordi, A. H. Shen, C. Ren, E. B. Esrick, J. P. Manis, D. M. Dorfman, A. Williams, A. Biffi, C.  
646 Brugnara, L. Biasco, C. Brendel, Highly efficient therapeutic gene editing of human  
647 hematopoietic stem cells, **25**, 776–783 (2019).
- 648 36. H. Frangoul, D. Altshuler, M. D. Cappellini, Y.-S. Chen, J. Domm, B. K. Eustace, J. Foell, J. de  
649 la Fuente, S. Grupp, R. Handgretinger, T. W. Ho, A. Kattamis, A. Kernytsky, J. Lekstrom-Himes,  
650 A. M. Li, F. Locatelli, M. Y. Mapara, M. de Montalembert, D. Rondelli, A. Sharma, S. Sheth, S.  
651 Soni, M. H. Steinberg, D. Wall, A. Yen, S. Corbacioglu, CRISPR-Cas9 Gene Editing for Sickle Cell  
652 Disease and  $\beta$ -Thalassemia., *N. Engl. J. Med.* (2020), doi:10.1056/NEJMoa2031054.
- 653 37. Z. Garate, O. Quintana-Bustamante, A. M. Crane, E. Olivier, L. Poirot, R. Galetto, P. Kosinski,  
654 C. Hill, C. Kung, X. Agirre, I. Orman, L. Cerrato, O. Alberquilla, F. Rodriguez-Fornes, N. Fusaki, F.  
655 Garcia-Sanchez, T. M. Maia, M. L. Ribeiro, J. Sevilla, F. Prosper, S. Jin, J. Mountford, G.  
656 Guenechea, A. Gouble, J. A. Bueren, B. R. Davis, J. C. Segovia, Generation of a High Number of  
657 Healthy Erythroid Cells from Gene-Edited Pyruvate Kinase Deficiency Patient-Specific Induced  
658 Pluripotent Stem Cells, *Stem Cell Reports* **5**, 1053–1066 (2015).
- 659 38. O. Q. Id, S. Fa, I. Orman, R. Torres, P. Duchateau, L. Poirot, J. A. Bueren, J. C. Segovia, Gene  
660 editing of PKLR gene in human hematopoietic progenitors through 5' and 3' UTR modified  
661 TALEN mRNA, , 1–20 (2019).
- 662 39. G. Schioli, A. Conti, S. Ferrari, L. della Volpe, A. Jacob, L. Albano, S. Beretta, A. Calabria, V.  
663 Vavassori, P. Gasparini, E. Salataj, D. Ndiaye-Lobry, C. Brombin, J. Chaumeil, E. Montini, I.  
664 Merelli, P. Genovese, L. Naldini, R. Di Micco, Precise Gene Editing Preserves Hematopoietic

- 665 Stem Cell Function following Transient p53-Mediated DNA Damage Response, *Cell Stem Cell*  
666 **24**, 551-565.e8 (2019).
- 667 40. J. Shapiro, O. Iancu, A. M. Jacobi, M. S. McNeill, R. Turk, G. R. Rettig, I. Amit, A. Tovin-Recht,  
668 Z. Yakhini, M. A. Behlke, A. Hendel, Increasing CRISPR Efficiency and Measuring Its Specificity in  
669 HSPCs Using a Clinically Relevant System, *Mol. Ther. - Methods Clin. Dev.* **17**, 1097–1107  
670 (2020).
- 671 41. R. O. Bak, N. Gomez-Ospina, M. H. Porteus, Gene Editing on Center Stage, *Trends Genet.*  
672 **34**, 600–611 (2018).
- 673 42. N. Hubbard, D. Hagin, K. Sommer, Y. Song, I. Khan, C. Clough, H. D. Ochs, D. J. Rawlings, A.  
674 M. Scharenberg, T. R. Torgerson, Targeted gene editing restores regulated CD40L function in X-  
675 linked hyper-IgM syndrome, *Blood* **127**, 2513–2522 (2016).
- 676 43. R. A. Voit, A. Hendel, S. M. Pruett-Miller, M. H. Porteus, Nuclease-mediated gene editing by  
677 homologous recombination of the human globin locus, *Nucleic Acids Res.* **42**, 1365–1378  
678 (2014).
- 679 44. C. Lin, H. Li, M. Hao, D. Xiong, Y. Luo, C. Huang, Q. Yuan, J. Zhang, N. Xia, Increasing the  
680 Efficiency of CRISPR/Cas9-mediated Precise Genome Editing of HSV-1 Virus in Human Cells, *Sci.*  
681 *Rep.* **6**, 1–13 (2016).
- 682 45. T. Maruyama, S. K. Dougan, M. Truttmann, A. M. Bilate, J. R. Ingram, H. L. Ploegh, Inhibition  
683 of non-homologous end joining increases the efficiency of CRISPR/Cas9-mediated precise [TM:  
684 inserted] genome editing, *Nature* **33**, 538–542 (2015).
- 685 46. J. Song, D. Yang, J. Xu, T. Zhu, Y. E. Chen, J. Zhang, RS-1 enhances CRISPR/Cas9- and TALEN-  
686 mediated knock-in efficiency, *Nat. Commun.* **7**, 1–7 (2016).
- 687 47. E. Haapaniemi, S. Botla, J. Persson, B. Schmierer, J. Taipale, CRISPR-Cas9 genome editing  
688 induces a p53-mediated DNA damage response, *Nat. Med.* **24**, 927–930 (2018).
- 689 48. J. I. Garaycochea, G. P. Crossan, F. Langevin, L. Mulderrig, S. Louzada, F. Yang, G. Guilbaud,  
690 N. Park, S. Roerink, S. Nik-Zainal, M. R. Stratton, K. J. Patel, Alcohol and endogenous aldehydes  
691 damage chromosomes and mutate stem cells, *Nature* **553**, 171–177 (2018).
- 692 49. R. Basar, M. Daher, N. Uprety, E. Gokdemir, A. Alsuliman, E. Ensley, G. Ozcan, M. Mendt, M.  
693 H. Sanabria, L. N. Kerbauy, A. K. N. Cortes, L. Li, P. P. Banerjee, L. Muniz-Feliciano, S. Acharya,  
694 N. W. Fowlkes, J. Lu, S. Li, S. Mielke, M. Kaplan, V. Nandivada, M. Bdaiwi, A. D. Kontoyiannis, Y.  
695 Li, E. Liu, S. Ang, D. Marin, L. Brunetti, M. C. Gundry, R. Turk, M. S. Schubert, G. R. Rettig, M. S.

696 McNeill, G. Kurgan, M. A. Behlke, R. Champlin, E. J. Shpall, K. Rezvani, Large-scale GMP-  
697 compliant CRISPR-Cas9-mediated deletion of the glucocorticoid receptor in multivirus-specific  
698 T cells, *Blood Adv.* **4**, 3357–3367 (2020).

699 50. S. Charrier, M. Ferrand, M. Zerbato, G. Précigout, A. Viorner, S. Bucher-Laurent, S.  
700 Benkhelifa-Ziyyat, O. W. Merten, J. Perea, A. Galy, Quantification of lentiviral vector copy  
701 numbers in individual hematopoietic colony-forming cells shows vector dose-dependent  
702 effects on the frequency and level of transduction, *Gene Ther.* **18**, 479–487 (2011).

703 51. Michael W. Pfaffl, A new mathematical model for relative quantification in real-time RT-  
704 PCR, *Mon. Not. R. Astron. Soc.* **29**, 2003–2007 (2001).

705 52. S. Q. Tsai, Z. Zheng, N. T. Nguyen, M. Liebers, V. V Topkar, V. Thapar, N. Wyvekens, C.  
706 Khayter, A. J. Iafrate, L. P. Le, M. J. Aryee, J. K. Joung, GUIDE-seq enables genome-wide  
707 profiling of off-target cleavage by CRISPR-Cas nucleases, *Nat. Biotechnol.* **33**, 187–197 (2015).

708

#### 709 **AUTHOR CONTRIBUTIONS:**

710 S.F.B. and O.Q.B. designed and performed the experiments and wrote the manuscript; O.A., R.S.,  
711 M.D., I.O., helped in the experimental procedures; D.P.D. and J.C. contributed in the  
712 experimental design; M.S.S., R.T., M.A.B., performed and analyzed experiments; J.L.L.L. and P.B.  
713 provided samples, J.A.B. suggested procedures; M.P. contributed to the experiments design and  
714 suggested procedures; J.C.S. designed the experiments, wrote the manuscript and provided  
715 grant support.

716

#### 717 **CONFLICT OF INTEREST**

718 J.C.S. and J.A.B. are consultants, hold shares and receive funding from Rocket Pharma. M.P.  
719 serves on the scientific advisory board of CRISPR Therapeutics and Graphite Bio. D.P.D. is  
720 employed by Graphite Bio. R.T., M.S.S. and M.A.B. are employed by Integrated DNA  
721 Technologies, Inc (IDT), which manufactures reagents similar to some described in the  
722 manuscript. R.T. and M.A.B. own equity in DHR, the parent company of IDT. All other authors  
723 declare that no competing financial conflict exists.

724

#### 725 **ACKNOWLEDGEMENTS**

726 The authors would like to thank Miguel A. Martin for the careful maintenance of PKD deficient  
727 mice, and Mrs. Aurora de la Cal, María del Carmen Sánchez, Soledad Moreno, Nadia Abu-sabha,  
728 Montserrat Aldea and Mr. Sergio Losada for their dedicated administrative help. This work was  
729 supported by grants from “Ministerio de Economía, Comercio y Competitividad y Fondo Europeo  
730 de Desarrollo Regional (FEDER)” (SAF2017-84248-P), “Fondo de Investigaciones Sanitarias,  
731 Instituto de Salud Carlos III” (Red TERCEL; RD16/0011/0011) and Comunidad de Madrid  
732 (AvanCell, B2017/BMD-3692). The authors also thank Fundación Botín for promoting  
733 translational research at the Hematopoietic Innovative Therapies Division of the CIEMAT.  
734 CIBERER is an initiative of the “Instituto de Salud Carlos III” and “Fondo Europeo de Desarrollo  
735 Regional (FEDER)”.



736 FIGURES

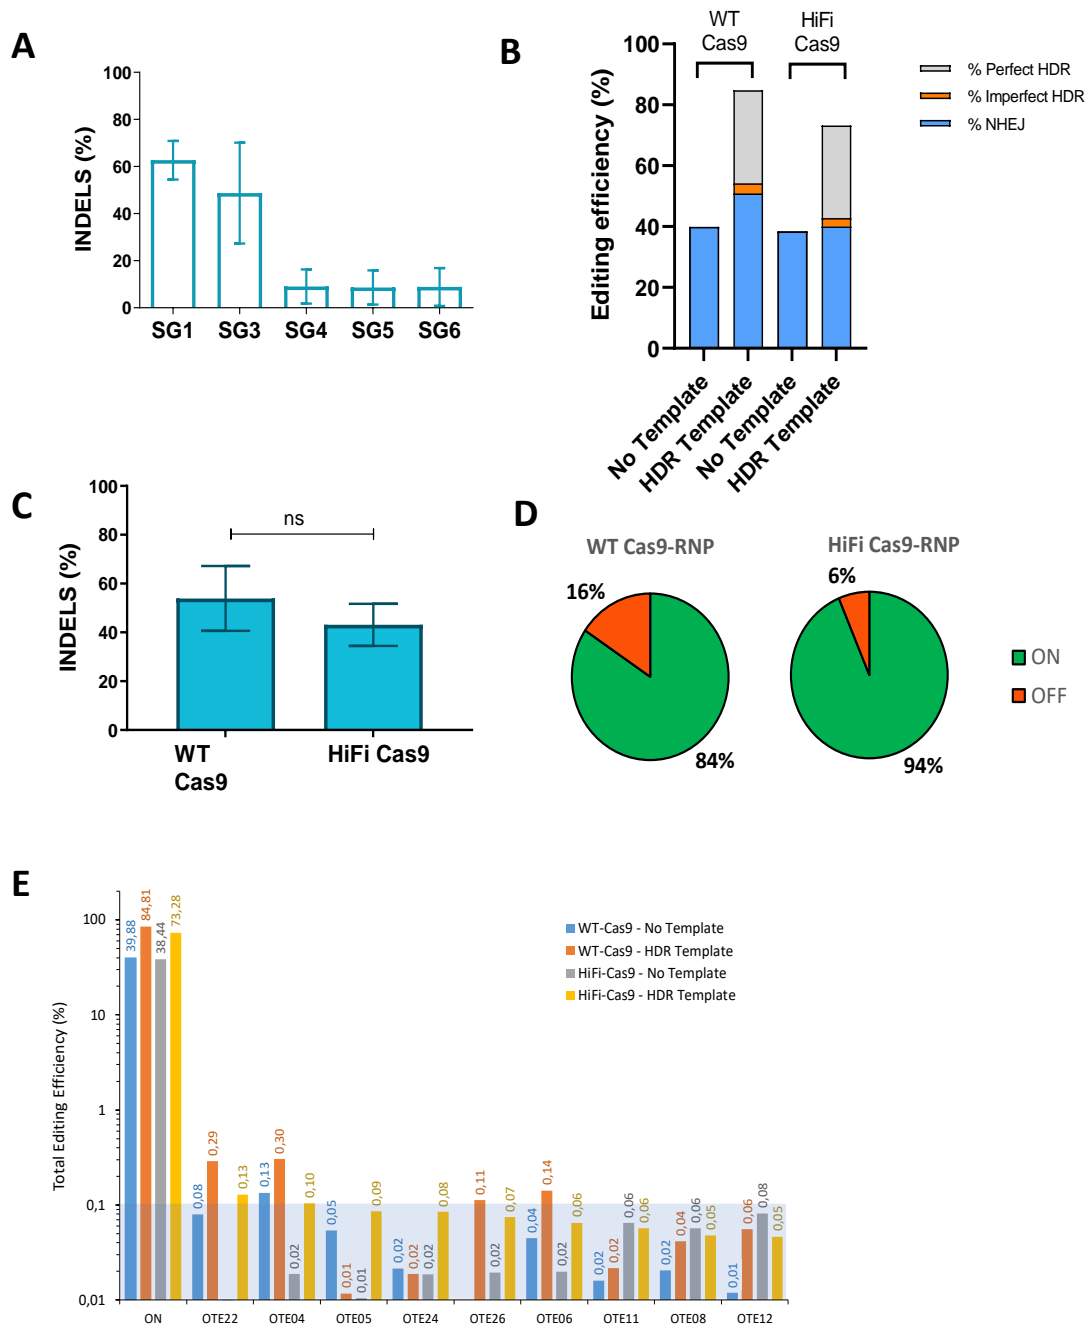

737

738 **Figure 1. Selected sgRNA displays high on target efficiency and very low off-target incidence.**

739 **A)** Generation of insertions and Deletions (InDels) in CB-CD34<sup>+</sup> cells with different guides  
 740 selected around the transcription starting site of the *RPK* cDNA; Data are represented as mean  
 741  $\pm$  SD; N=3; **B)** Analyses of the HDR vs NHEJ in samples edited with SG1, complexed with either  
 742 WT Cas9 or HiFi Cas9. Blue, % of NHEJ repair, Gray, % of perfect HDR, Orange, % of imperfect  
 743 HDR. **C)** Comparison of the generation of InDels in CD34<sup>+</sup> cells by SG1 electroporated as RNP  
 744 using, wild-type or HiFi Cas9 protein; Data are represented as mean  $\pm$  SD; N=3; **D)** On-target and

745 Off-target frequency estimated by GUIDE-seq using either wild-type or HiFi Cas9 in the RNP  
746 complex; **E**) Analyses of total gene editing efficiency by Cas9 HiFi+SG1±HDR-SG1 template in the  
747 top ten sites ranked high-low. In orange and yellow bars, gene editing caused by SG1 complexed  
748 with WT Cas9 or HiFi Cas9, respectively, in the absence of the specific HDR template. In blue and  
749 grey bars, the gene editing caused by SG1 complexed with WT Cas9 or HiFi Cas9, respectively, in  
750 the presence of the specific HDR template. Blue square indicates the limit of detection of the  
751 assay (<0.1%). Significance was analyzed by non-parametric two tailed Mann Whitney's test.

752

753

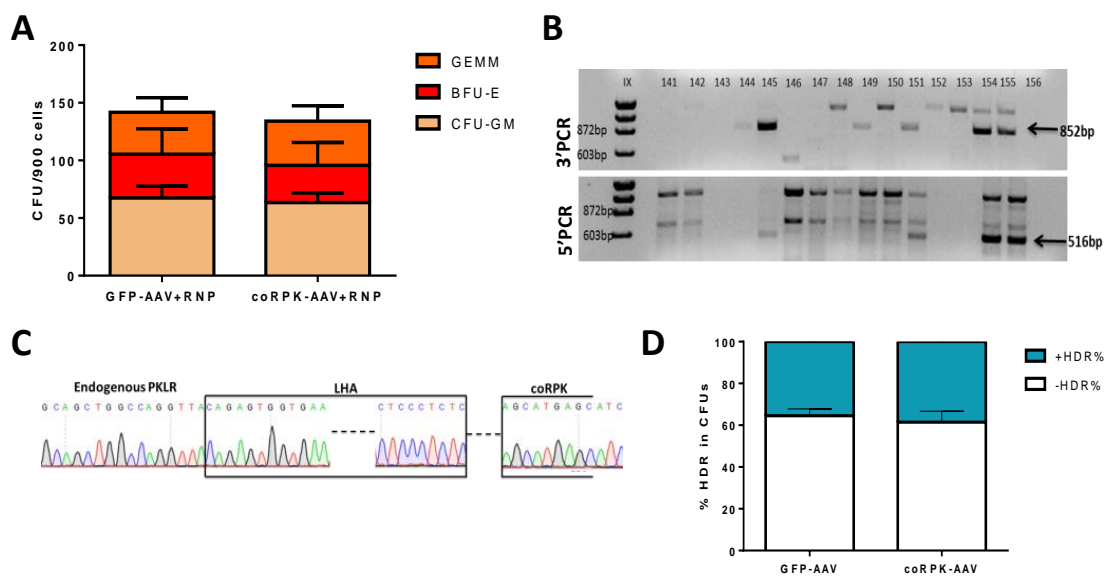

754

755 **Figure 2. RNP plus AAV6 efficient gene targeting in human hematopoietic progenitor cells. A)**

756 Colony Forming Unit number and distribution is maintained when cells are transduced with  
757 either of the donor AAVs in 5 independent experiments. GEMM,  
758 Granulocyte/erythrocyte/monocyte/megakaryocyte progenitors; BFU-E, Burst Forming Unit-  
759 Erythroid; CFU-GM, Colony Forming Unit-Erythroid; **B**) Representative agarose gel of the PCR  
760 analyses of the specific integration of coRPK in individually picked colonies by amplification of  
761 the right and the left homology arms (RHA, 852bp and LHA, 516bp, respectively) of the donor  
762 construct; **C**) Representative sanger sequencing of one of the positive amplicons; **D**) Percentage  
763 of correct HDR in CFUs assessed by PCR when cells were edited with GFP-AAV or coRPK-AAV and  
764 RNP complex. Mean±SD is indicated.

765

766

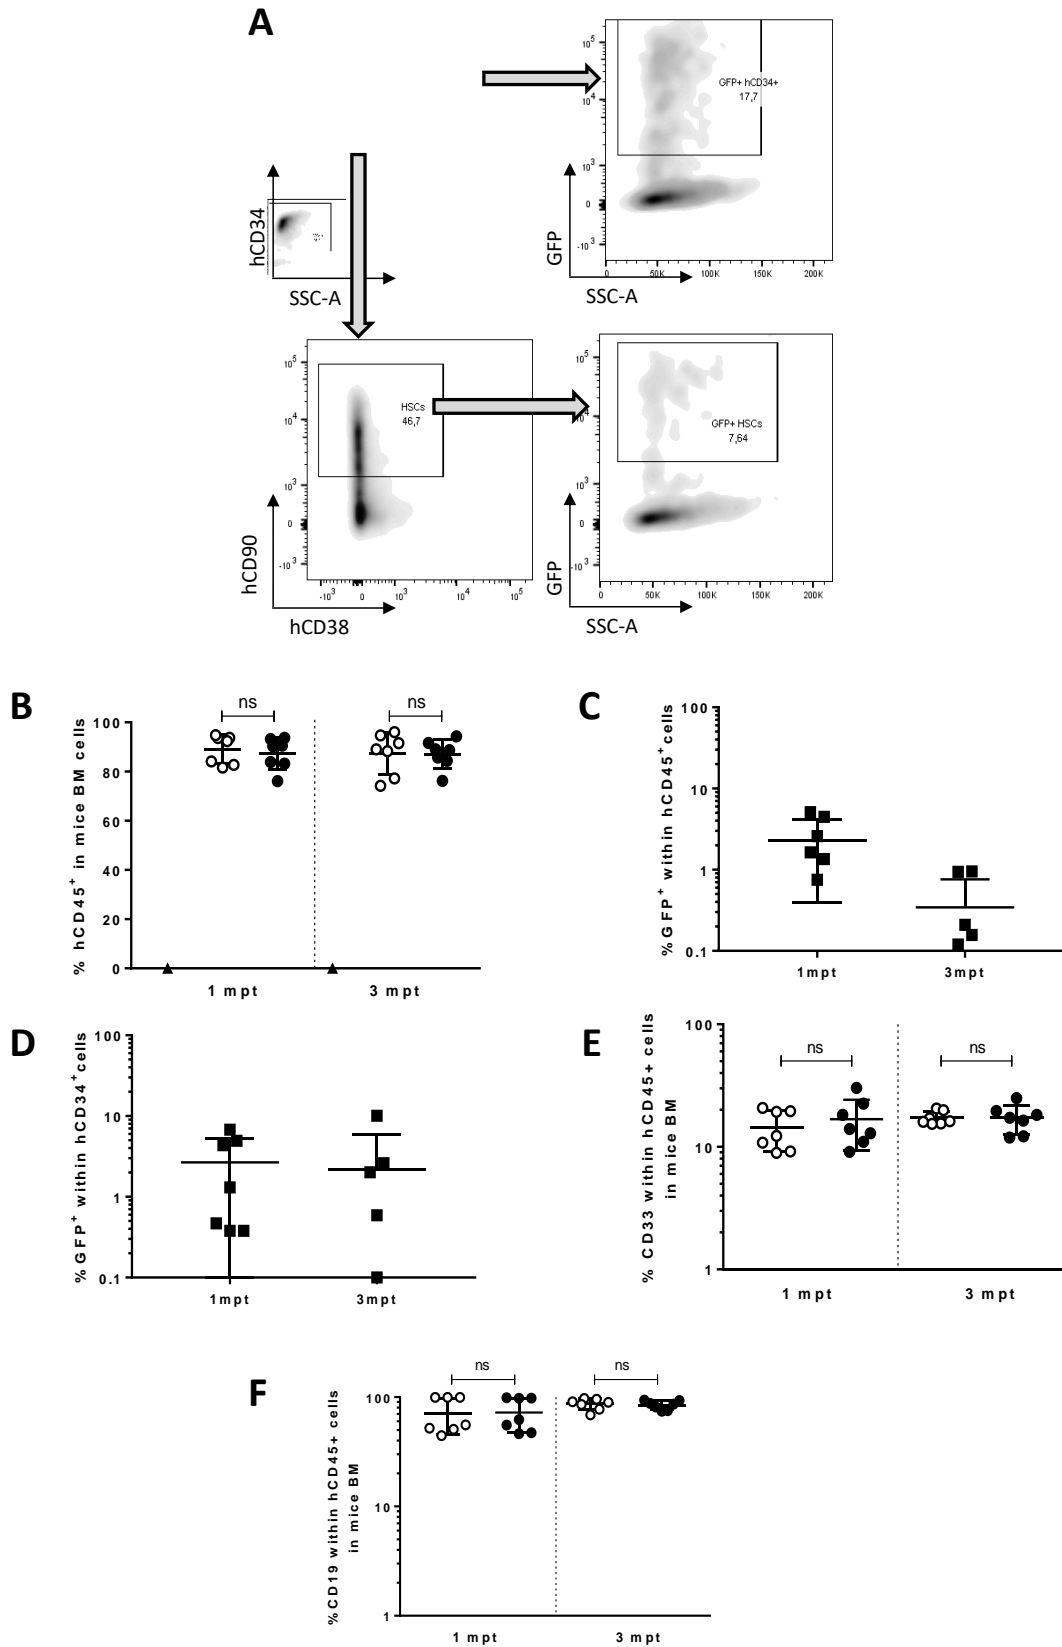

767

768 **Figure 3. Targeted human hematopoietic stem cells engrafted in immunodeficient mice. A)**

769 FACS analysis 48hpt of hCD34<sup>+</sup> cells electroporated with the specific RNP and transduced with

770 GFP-AAV donor. GFP% within the total hCD34<sup>+</sup> cells and within the most primitive stem cells,

771 marked as hCD34<sup>+</sup>hCD38<sup>-</sup>hCD90<sup>+</sup>; **B**) Percentage of human cells in the BM of immunodeficient  
772 NSG mice transplanted with GFP-AAV- (white dots) or therapeutic-AAV- (black dots) edited cells,  
773 one and three months post-transplant. Triangle dot corresponds to one control animal  
774 transplanted with irradiated-hCD34<sup>-</sup> cells; Data are represented as mean  $\pm$  SD (n = 7 in each  
775 group); **C**) Percentage of GFP<sup>+</sup> cells within the human population (hCD45<sup>+</sup>) one and three months  
776 post-transplant; Data are represented as mean  $\pm$  SD (n = 7); **D**) Percentage of GFP<sup>+</sup> cells within  
777 the human progenitor (hCD34<sup>+</sup>) cells one and three months post-transplant; Data are  
778 represented as mean  $\pm$  SD (n = 7); **E**) Percentage of the hCD33<sup>+</sup> cells within the human  
779 population (hCD45<sup>+</sup>) in mice transplanted with cells edited with reporter (white dots) or  
780 therapeutic donor (black dots). Data are represented as mean  $\pm$  SD (n = 7 in each group); **F**)  
781 Percentage of the hCD19<sup>+</sup> cells within the human population in mice transplanted with cells  
782 edited with reporter (white dots) or therapeutic donor (black dots). Data are represented as  
783 mean  $\pm$  SD (n = 7 in each group); A two-way ANOVA was performed followed by Tukey's post  
784 hoc test. ns= not significant.

785

786

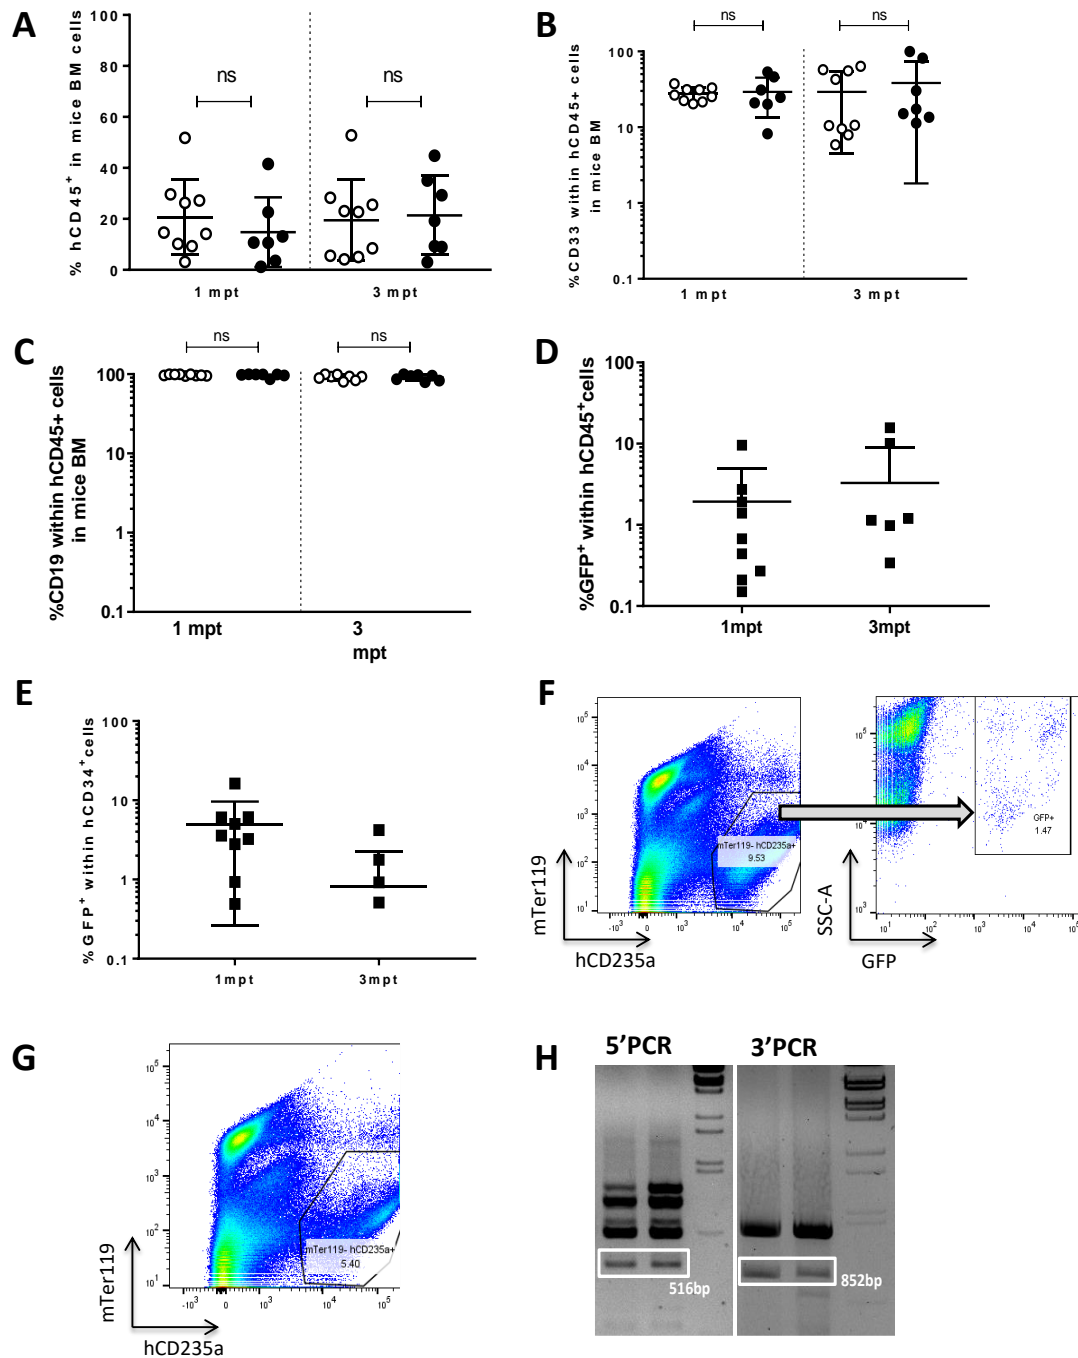

787

788 **Figure 4. Gene edited HSC are able to efficiently engraft and differentiate in secondary**  
 789 **transplanted immunodeficient mice. A)** Percentage of human CD45<sup>+</sup> cells in immunodeficient  
 790 NSG animals transplanted with total BM of primary transplanted animals with either GFP-AAV-  
 791 (white dots; n=9) or therapeutic-AAV- (black dots; n=7) edited cells analyzed one and three months  
 792 post-transplant; Data are represented as mean  $\pm$  SD; **B)** Percentage of the hCD33<sup>+</sup> cells within  
 793 the human population (hCD45<sup>+</sup>) in mice transplanted with cells edited with reporter (white dots;  
 794 n=9) or therapeutic donor (black dots; n=7). Data are represented as mean  $\pm$  SD; **C)** Percentage  
 795 of the hCD19<sup>+</sup> cells within the human population in mice transplanted with cells edited with

796 reporter (white dots; n=9) or therapeutic donor (black dots; n=7). Data are represented as mean  
797  $\pm$  SD; **D**) Percentage of GFP<sup>+</sup> cells within the human population (hCD45<sup>+</sup>) one and three months  
798 post-transplant; Data are represented as mean  $\pm$  SD; **E**) Percentage of GFP<sup>+</sup> cells within the  
799 human progenitor (CD34<sup>+</sup>) cells one and three months post-transplant; **F**) Representative dot-  
800 plot of human erythroid differentiation in secondary transplanted recipients of GFP-AAV-edited  
801 cells. Left, CD235a vs mTer119 expression to identify human erythroid cells. Right, GFP  
802 expression within human erythroid population (CD235a<sup>+</sup>); **G**) Representative dot-plot of human  
803 erythroid differentiation in secondary transplanted recipients of therapeutic-AAV-edited cells.  
804 Left, CD235a vs CD71 expression in human cells. Basophilic erythroblasts (gate A) and  
805 polychromatic plus orthochromatic erythroblasts (gate B) are shown; **H**) Representative agarose  
806 gel of PCR analysis of the 5' (LHA, 516 bp) and the 3' (RHA, 852 bp) sequences in two different  
807 mice's total BM cells, demonstrating correct integration of the donor fragment. A two-way  
808 ANOVA was performed followed by Tukey's post hoc test. ns= not significant.

809

810

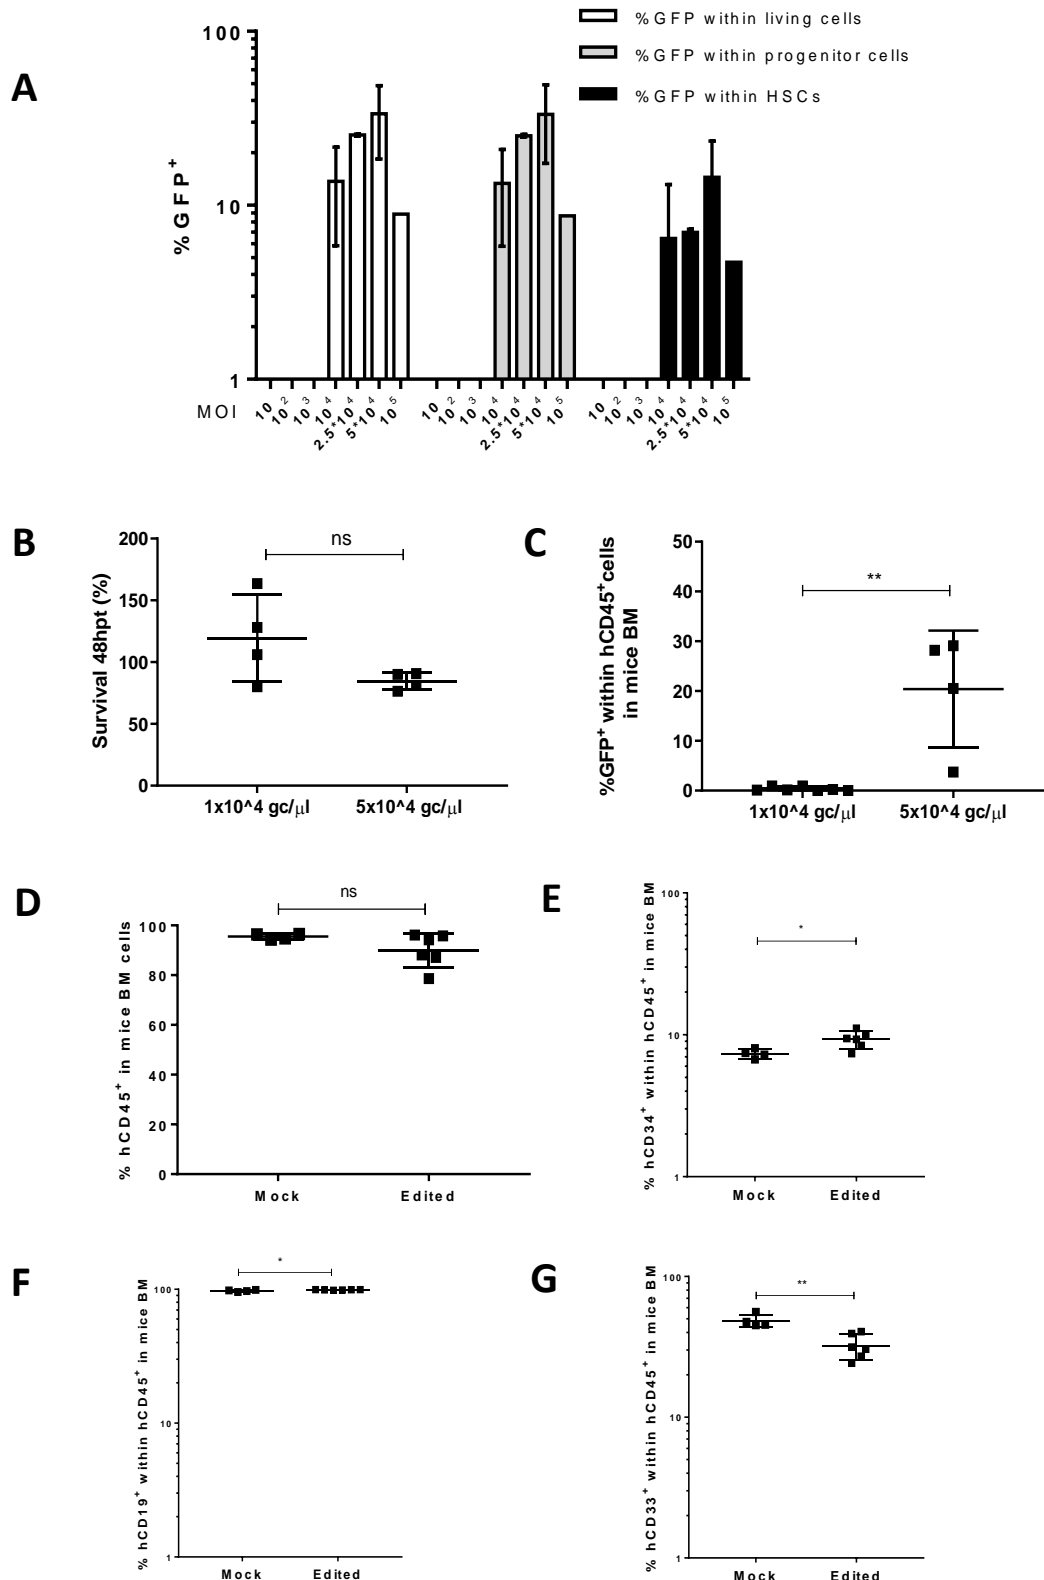

811

812 **Figure 5. Optimization of the gene editing protocol is able to restore the energetic balance in**  
 813 **PKD-HSPCs. A)** Percentage of GFP cells in different subpopulations (living cells, progenitor cells  
 814 [hCD34+] and HSCs [hCD34+hCD38+hCD90+] 48hpt using different MOIs ranging from 10 to  
 815 100000gc/μl of the reporter donor. **B)** Viability in HSPCs is not affected when increasing the

816 vector dose 5 times. **C)** % GFP is significantly higher in mice receiving HSPCs edited with  
817  $5 \times 10^4$ gc/ $\mu$ l GFP-AAV when compared with mice receiving cells edited with  $10^4$ gc/ $\mu$ l. **D)**  
818 Percentage of human CD45<sup>+</sup> cells in immunodeficient NBSGW animals transplanted with mPB  
819 CD34<sup>+</sup> cells from a PKD patient, previously edited with therapeutic-AAV-edited cells, analyzed 2  
820 months post-transplant; **E)** Percentage of the hCD34<sup>+</sup> cells within the human population(hCD45<sup>+</sup>)  
821 in animals engrafted with PKD edited human cells; **F)** Percentage of the hCD19<sup>+</sup> cells within the  
822 human population (hCD45<sup>+</sup>) in animals engrafted with PKD edited human cells; **G)** Percentage  
823 of the hCD33<sup>+</sup> cells within the human population (hCD45<sup>+</sup>) in animals engrafted with PKD edited  
824 human cells. Kruskal-Wallis multiple comparison test was performed; P value is indicated in the  
825 figure. ns=not significant

826

827



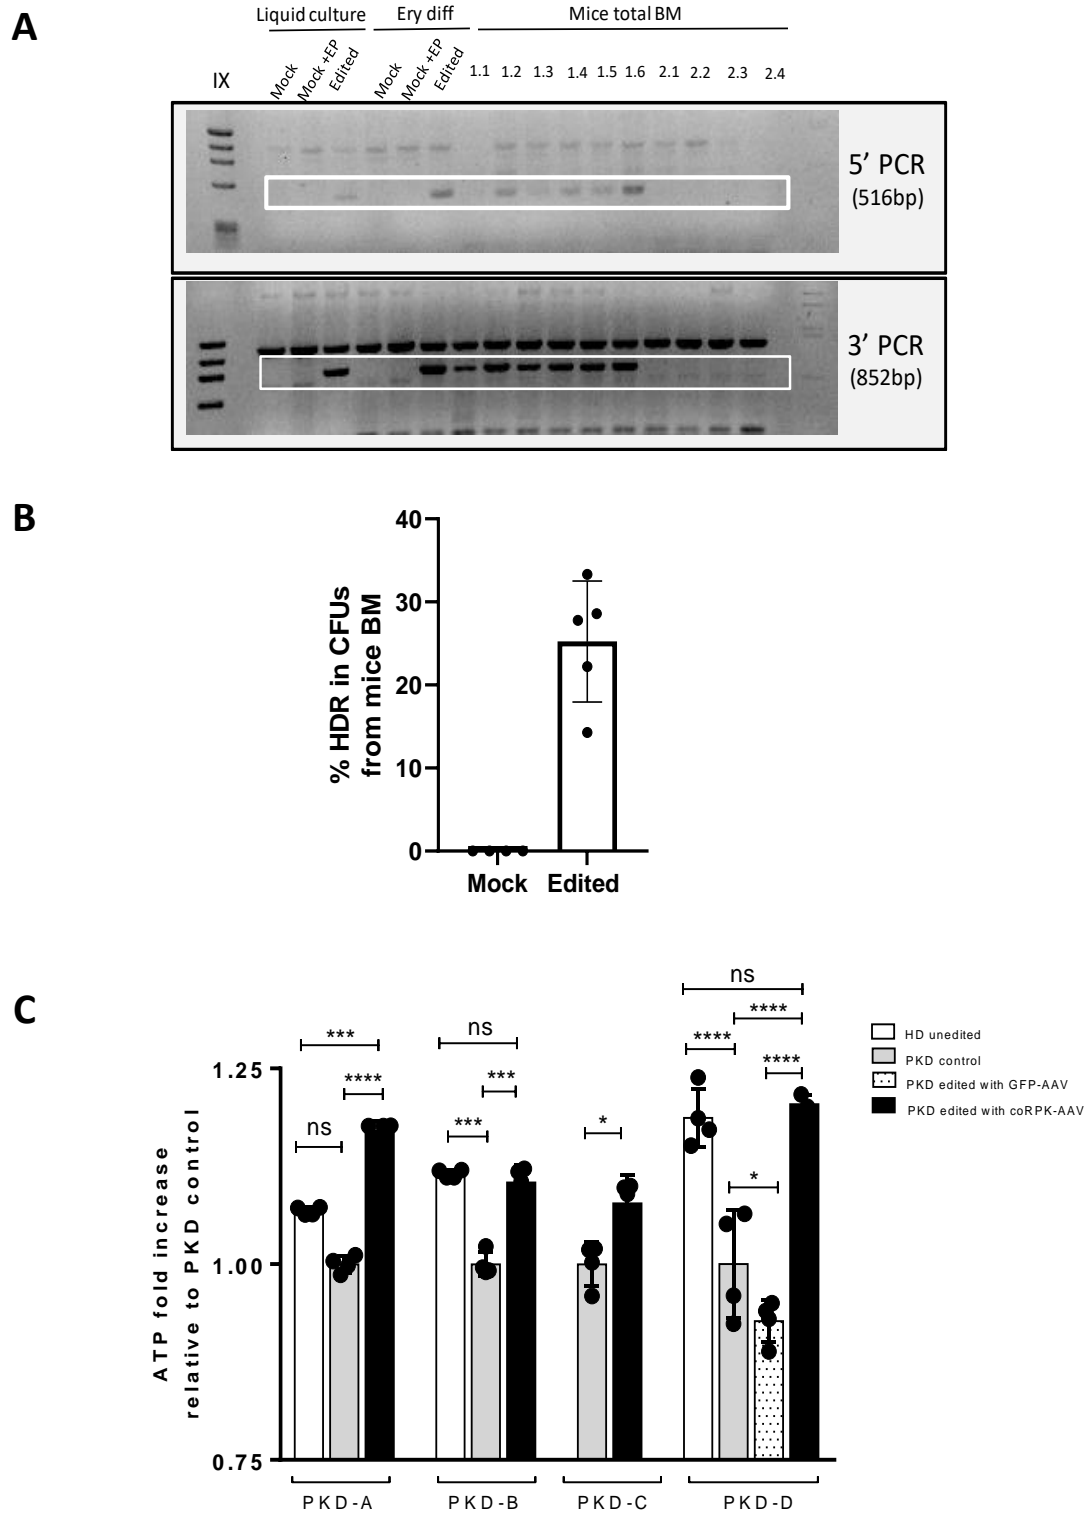

828

829 **Figure 6. Editing in engraftable PKD-HSPCs is feasible.** A) Representative agarose gel of 5' and  
 830 3' PCRs in samples pre-transplant (liquid culture), after erythroid differentiation (Ery diff), in  
 831 mice receiving edited cells (1.1, 1.2, 1.3, 1.4, 1.5 and 1.6) and in mice receiving unedited cells  
 832 (2.1, 2.2, 2.3 and 2.4). Mock: unedited cells; Mock+EP: unedited electroporated cells; coRPK:  
 833 cells edited with therapeutic donor; Squares identify amplification of the band showing

834 homologous directed integration; **B**) hCD34<sup>+</sup> cells were sorted from the total BM of NBSGW  
835 mice transplanted with PKD-D edited HSPCs. Sorted cells were cultured in methylcellulose and  
836 the percentage of HDR was assessed by specific PCR in 5' and 3' junctions. Data are represented  
837 as mean  $\pm$  SD; **C**) ATP quantification in *in vitro* differentiated erythroid cells obtained from CD34<sup>+</sup>  
838 cells of four PKD patients, previously edited with the GFP-AAV or the therapeutic-AAV donors.  
839 Three different healthy donors were also *in vitro* differentiated and analyzed. Data are  
840 relativized to unedited erythroid PKD cells. HD unedited: HSPCs from a healthy donor that had  
841 undergone *in vitro* erythroid differentiation; PKD unedited: HSPCs from a PKD patient that had  
842 undergone *in vitro* erythroid differentiation; PKD GFP/coRPK: HSPCs from a PKD patient that had  
843 undergone gene editing with GFP-AAV or coRPK-AAV and subsequent *in vitro* erythroid  
844 differentiation. Individual dots are replicates of the luminescence measurement and bars  
845 represent the media of the replicates. Kruskal-Wallis multiple comparison test was performed;  
846 P value is indicated in the figure. The significance was represented by P-values: \*P<0.05,  
847 \*\*P<0.01, \*\*\*P<0.005 and \*\*\*\*P<0.001. ns=not significant.

848

849 **SUPPLEMENTARY MATERIALS**

850 **Supplementary Figures**

851

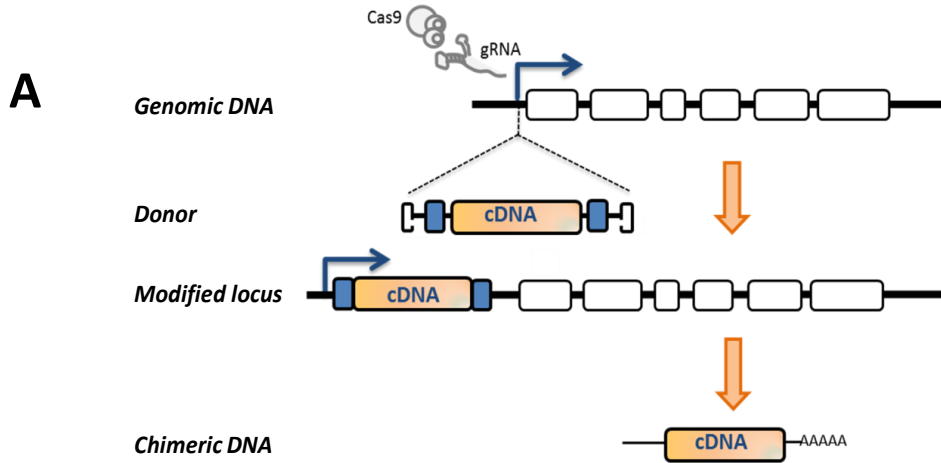

**B**

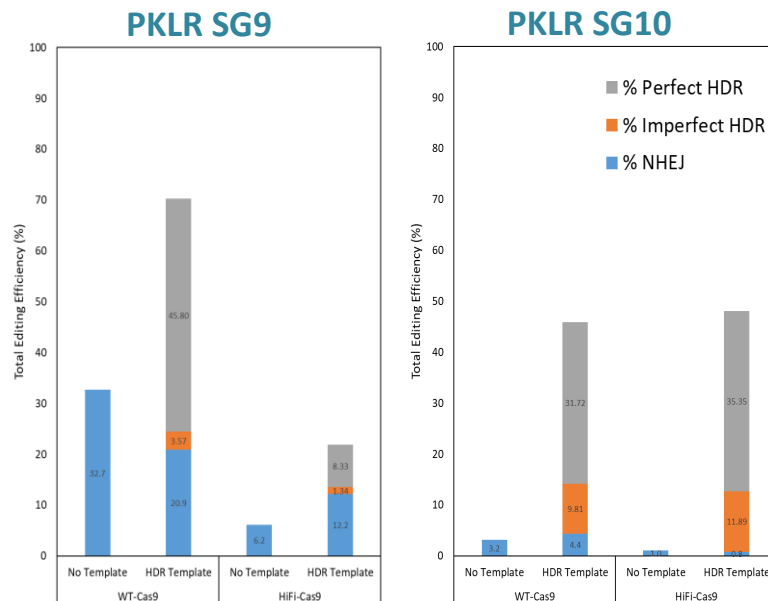

852

853 **Figure S1. Design and optimization of the gene editing tools. A)** Schematic of the gene editing  
 854 protocol in the transcription starting site of *PKLR* gene. **B)** Representative TIDE analysis of SG1-  
 855 RNP in CB-CD34+ cells. **C)** Identification of the off-targets produced by SG1-RNP in HSPCs by  
 856 rhamp-seq. **D)** Analysis of the decomposition of the HDR in samples edited with SG4 and SG5  
 857 RNPs. Blue, % of NHEJ repair, Gray, % of perfect HDR, orange, % of imperfect HDR.

858

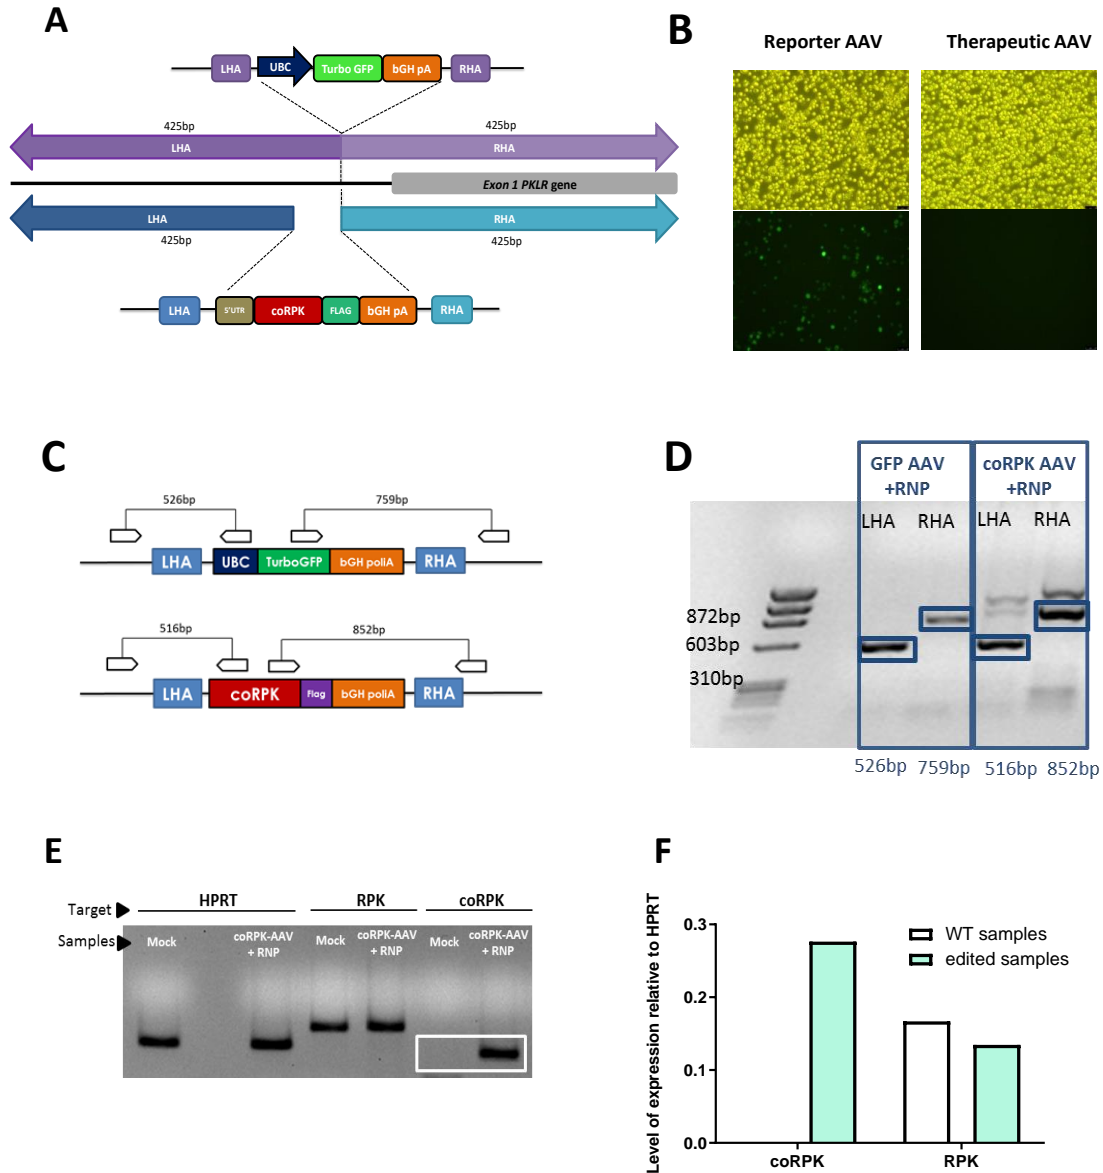

859

860 **Figure S2. Gene editing in K562 cell line. A)** Schematic representation of the HDR of reporter  
 861 (up) and therapeutic donor (down). LHA: left homology arm; UBC: Ubiquitin C promoter;  
 862 TurboGFP: Turbo green fluorescent protein; bGH pA: bovine growth hormone polyadenylation  
 863 signal; RHA: right homology arm; 5'UTR: untranslated region; coRPK: codon optimized R-type  
 864 Pyruvate Kinase; Flag: flag-tag sequence. **B)** Bright field and fluorescence micrographs of K562  
 865 cells edited with either the AAV-GFP or the AAV-RPK donor vectors. Above 30% cells expressed  
 866 GFP marker 5dpt. **C)** Specific in-out PCR strategy to assess the correct integration of both  
 867 reporter and therapeutic donor at both 5' (LHA) and 3' (RHA) junctions. **D)** Specific bands  
 868 verifying correct HDR in K562 cells. **E)** qRT-PCR products of samples transduced with therapeutic  
 869 donor (coRPK-AAV+RNP) or untransduced. Housekeeping (HPRT), RPK and coRPK. **F)**

870 Quantification of the qRT PCR. Levels of coRPK and RPK in mock (WT) and edited samples  
871 relativized to HPRT.

872

873

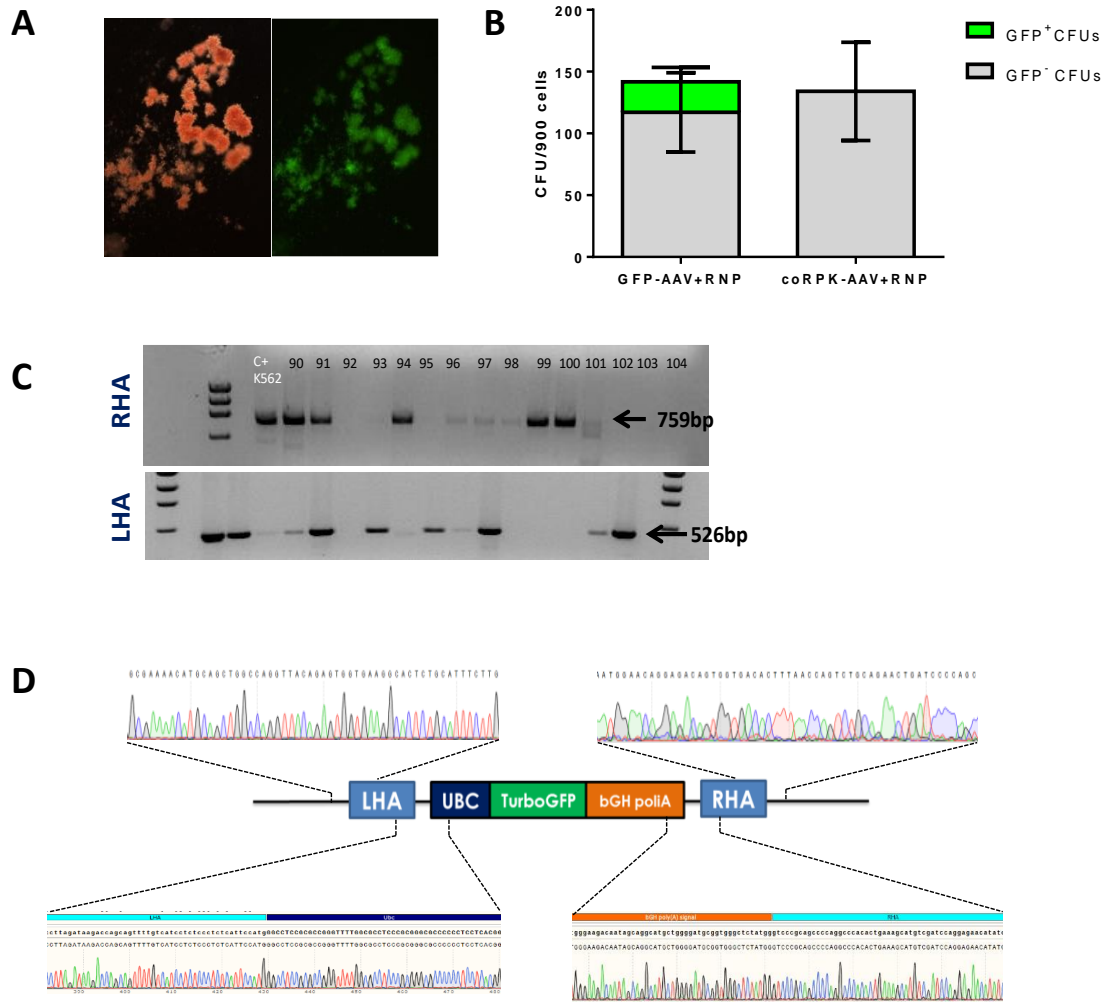

874

875 **Figure S3. Gene editing using both donor AAVs in hematopoietic progenitors. A)**

876 Representative GFP<sup>+</sup> BFU-E after gene editing using the AAV-GFP donor vector. **B)** Total number of CFUs and GFP<sup>+</sup> CFUs after gene editing with either the AAV-GFP or the AAV-RPK donor vectors.

877 Data are represented as mean  $\pm$  SD; N=3 **C)** Representative agarose gel for the specific 5' and 3'

878 PCRs in CFUs from cells edited with the AAV-GFP donor. **D)** Representative sanger sequencing

879 of one of the positive amplicons

880

881

882

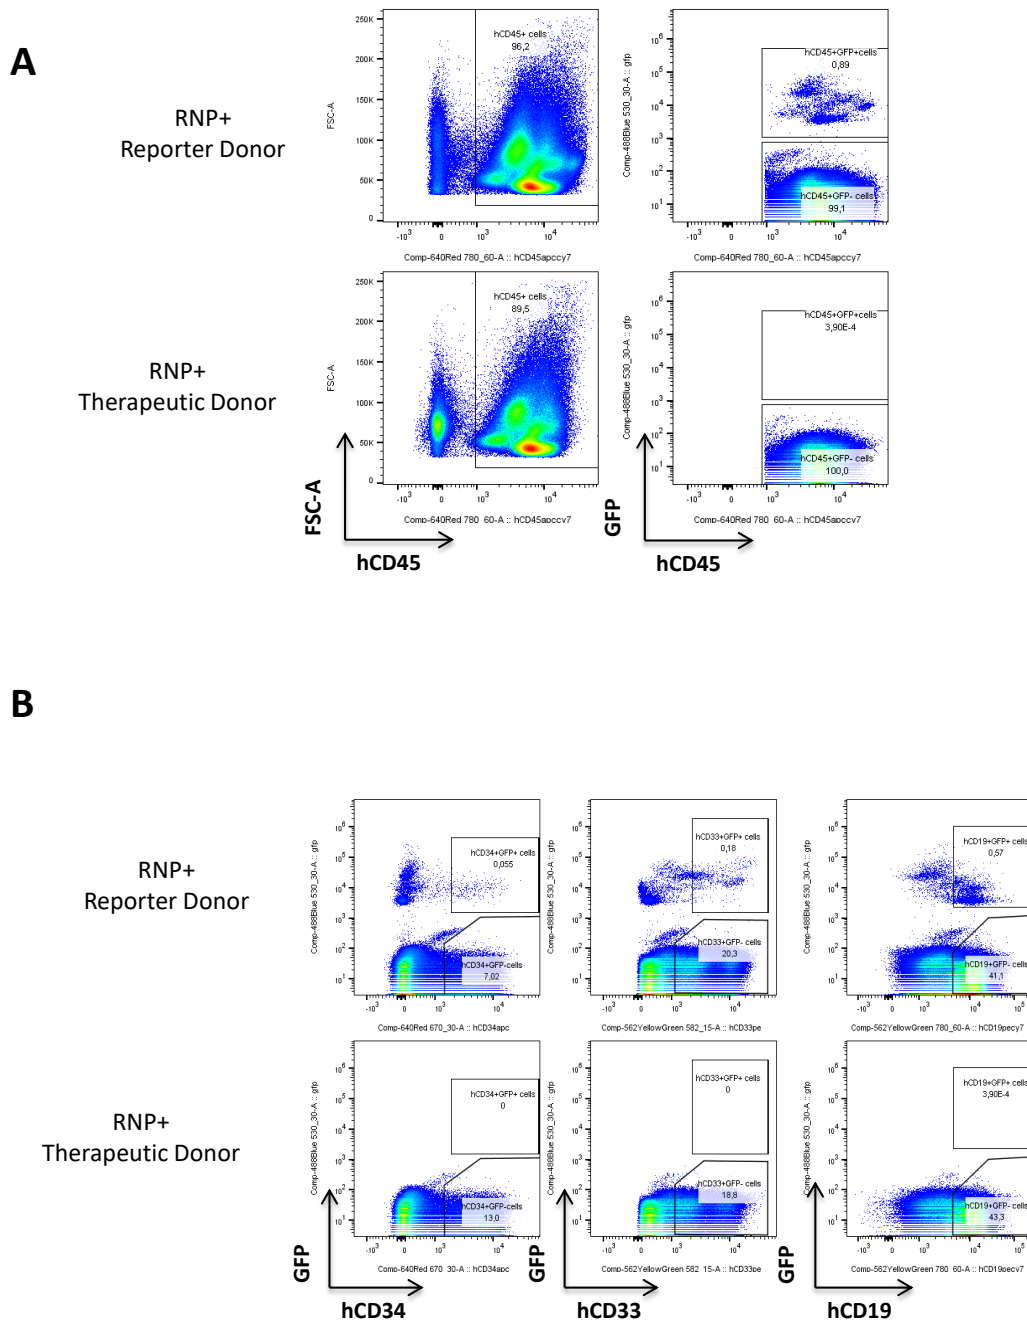

883

884 **Figure S4. Representative flow cytometry dot-plots of human cell engraftment in**  
885 **immunodeficient NSG mice. A) FACS analyses of the BM of a mouse transplanted with HSPCs**  
886 **edited with the reporter donor (up) and from a mouse transplanted with cells edited with the**  
887 **therapeutic donor (bottom). B) Representative analyses of a multilineage engraftment by**  
888 **assessing CD34, CD33 and CD19 populations.**

889

890

891

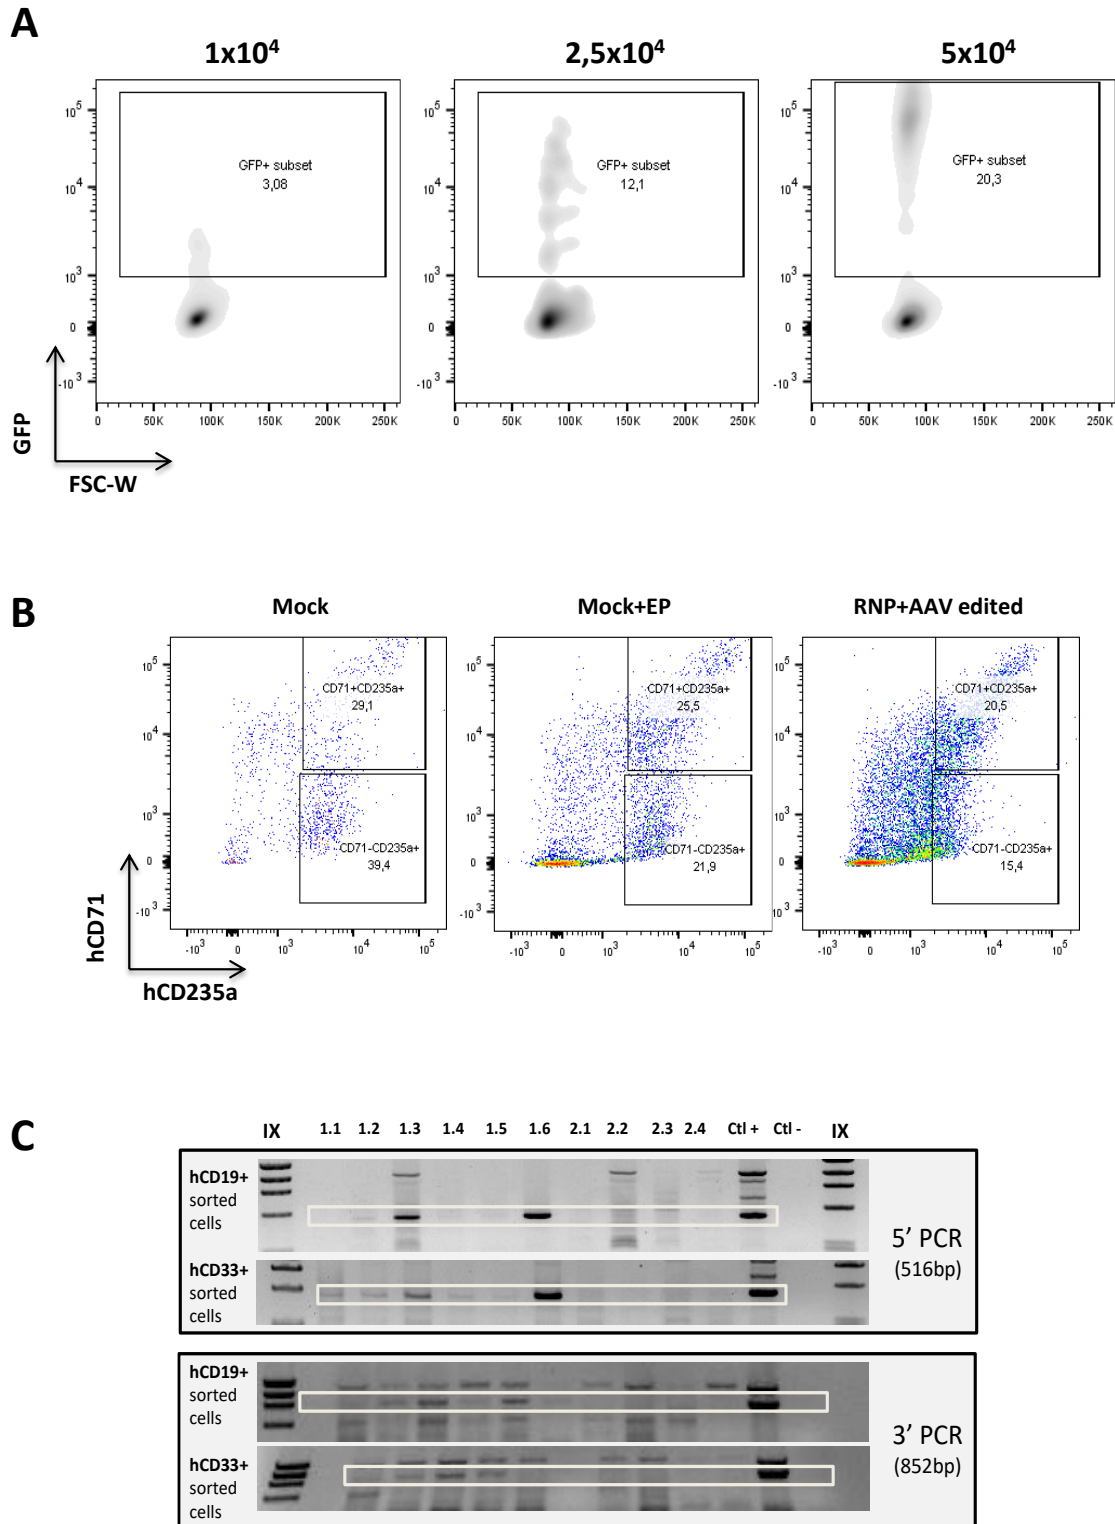

892

893 **Figure S5. Optimizations in the gene editing protocol. A)** FACS analysis of a representative  
 894 sample of the reporter donor titration. **B)** Terminal erythroid differentiation of an edited PKD  
 895 sample does not differ from the differentiation of unedited samples. **C)** 5' and 3' PCRs in hCD19+  
 896 and hCD33+ population sorted from the mice receiving edited cells (1.1, 1.2, 1.3, 1.4, 1.5 and  
 897 1.6) and from mice receiving unedited cells (2.1, 2.2, 2.3 and 2.4).

898

899 **Supplementary tables**

900 **Table S1: List of the different guide RNAs designed to target the transcription starting site of**

901 **PKLR locus.**

| Name | Sequence (5' to 3')   | PAM |
|------|-----------------------|-----|
| SG1  | CTGCGGGACCATGGAATGAG  | AGG |
| SG2  | TGGGGACAGGGTGGCCTACT  | GGG |
| SG3  | AAACTGCTGGTCTTATCTA   | AGG |
| SG4  | AGAAAAGGGGCACACCCAGT  | AGG |
| SG5  | TGGTCCCGCAGCCCCAGGCC  | TGG |
| SG6  | CTCCCTCTCATTCCATGGTC  | AGG |
| SG7  | CAGCCCCAGGCCACACTGA   | CGG |
| SG8  | TTCCATGGTCCCGCAGCCCC  | AGG |
| SG9  | CACTGAAAGCATGTGCGATCC | AGG |
| SG10 | AAACTGCTGGTCTTATCTAA  | GGG |

902

903

904 **Table S2: On-target and off-target analysis using GUIDE-Seq of the designed gRNAs in Hek293**

905 **cell line that constitutively expressed Cas9.**

| GUIDE NAME | SEQUENCE (5'-3')      | DESIGN TOOL | OTE# SITES DETECTED | OTE SITES >1% | ON-TARGET (%) |
|------------|-----------------------|-------------|---------------------|---------------|---------------|
| SG1        | CTGCGGGACCATGGAATGAG  | MIT         | 448                 | 147           | 9.2           |
| SG2        | TGGGGACAGGGTGGCCTACT  | MIT         | 534                 | 140           | 7.5           |
| SG3        | AAACTGCTGGTCTTATCTA   | MIT         | 49                  | 26            | 23.1          |
| SG4        | AGAAAAGGGGCACACCCAGT  | IDT         | 554                 | 116           | 11.3          |
| SG9        | CACTGAAAGCATGTGCGATCC | IDT         | 7                   | 0             | 100           |
| SG10       | AAACTGCTGGTCTTATCTAA  | IDT         | 28                  | 9             | 73.3          |

906 # Off-target effect



907

908

909 **Table S3: Sequence of the HDR templates used for the analysis of the gene editing nature.**

| Name       | Sequece (5'-3')                                              |
|------------|--------------------------------------------------------------|
| <b>SG1</b> | T*G*CTTTCACGTGTGGGCCTGGGGCTGCGGGACCATGGAATGAATTCGAGAGGGGAGAG |
| <b>HDR</b> | GATGACAAAACCTGCTGGTCTTATCTAA*G*G                             |
| <b>SG4</b> | A*T*GGTCCCGCAGCCCCAGGCCACACTGAAAGCATGTGAGAAATTCTCCAGGAGAACA  |
| <b>HDR</b> | TATCATCCCTGCAGCTTCGGTCATGG*G*T                               |
| <b>SG5</b> | G*G*AATGAGAGGGAGAGGATGACAAAACCTGCTGGTCTTATCGAATTCTAAGGGAGACA |
| <b>HDR</b> | GAGAAGAGAAAAGGGGCACACCCAGTA*G*G                              |

910

911

912 **Table S4: Specific mutations present in heterozygosity in the PKD samples used for the**  
 913 **experiments.**

| Patient      | Mutations           |
|--------------|---------------------|
| <b>PKD-A</b> | c.1552C>A c.1456C>T |
| <b>PKD-B</b> | c.1003G>A c.1456C>T |
| <b>PKD-C</b> | c.721G>T c.1529G>A  |
| <b>PKD-D</b> | c.359C>T c.1168G>A  |

914

915

916 **Table S5: Primers used in the HDR analysis.**

| Primer | Name            | Sequence (5' to 3')         | Tm (°C) | Amplicon size |
|--------|-----------------|-----------------------------|---------|---------------|
| Fw     | LHA donorGFP 1F | AGGCGAAAACATGCAGCTGG        | 60°C    | 526bp         |
| Rv     | LHA donorGFP 1R | CGTGGCAGCGCTCGC             |         |               |
| Fw     | RHA donorGFP 3F | AGCACGCCTTCAAGACCCC         | 62°C    | 759bp         |
| Rv     | RHA donorGFP 3R | GCTGGGGATCAGTTCTGCAGA       |         |               |
| Fw     | LHA donorRPK 1F | GAAAACATGCAGCTGGCCAGG       | 58°C    | 516bp         |
| Rv     | LHA donorRPK 1R | CAGAGAGCTGATATTTTCTGGATGCTC |         |               |
| Fw     | RHA donorRPK 3F | CAGCGGCTACACCAACATCATGA     | 60°C    | 852bp         |
| Rv     | RHA donorRPK 3R | CACCTCTCTGGGTCTCCCTCT       |         |               |

917

918

## 919 **Supplementary materials and methods**

### 920 ***In vitro* erythroid differentiation**

921 Human hematopoietic progenitors were differentiated towards erythroid lineage using a 14-day  
922 protocol, in which three different erythroid differentiation medium (EDM) were used. A basal  
923 medium was prepared and could be stored for 7 days at 4°C. Erythroid basal medium (EBM) was  
924 composed by IMDM, 2% FBS, 0.5% P/S solution, 3% human AB Serum (Sigma-Aldrich), 10µg/ml  
925 Insulin (Sigma-Aldrich), 3U/ml Heparin (Sigma-Aldrich), and 200µg/ml Holo-transferrin (Sigma-  
926 Aldrich). Over basal medium, specific factors for the different steps of erythroid differentiation  
927 were added. Concentration was adjusted to 3x10<sup>5</sup>cells/ml for all the stages of the protocol. Cells  
928 were cultured in Erythroid Differentiation Medium-1 (EDM1) from days 0 to 6. EDM1 was  
929 prepared by adding 3U/ml EPO (Amgen), 10ng/ml SCF, 1ng/ml human interleukin 3 (hIL-3)  
930 (Eurobiosciences), and 1µM Dexamethasone (Sigma-Aldrich) to the EBM. On day 6, cell culture  
931 was transferred to Erythroid Differentiation Medium-2 (EDM2), composed by EBM  
932 supplemented with 3U/ml EPO and 10ng/ml SCF until day 9. For the last 5 days of the protocol,  
933 medium was based on EBM supplemented with 3U/ml EPO and increased concentration of holo-  
934 transferrin (200µg/ml) (EDM3). Cells were always cultured under normoxic conditions: 37°C,  
935 21% O<sub>2</sub>, 5% CO<sub>2</sub> and 95% relative humidity.

936

### 937 **rAAV cloning and production**

938 A Reporter Donor was planned using SnapGene v1.1.3 software (GSL Biotech LLC). Homology  
939 Arms (HAs) of 425bp were designed around the SG1 guide RNA cutting site (see Table S1) in the  
940 *PKLR* starting site environment. The construct was comprised by 425bp-homologous arms (HAs)  
941 that flanked the Ubiquitin C Promoter (UBC) driving the expression of a Turbo-GFP sequence  
942 and a bGH polyadenylation signal (Figure S2). This donor sequence was cloned into a transfer  
943 plasmid carrying ITRs from pAAV-MCS plasmid (Agilent Technologies) containing AAV2 ITRs. The  
944 Therapeutic Donor, we aimed the expression of coRPK to be driven by the endogenous *PKLR*  
945 promoter, and thus, we did not add any promoter sequences. The RHA sequence was shared  
946 with Reporter Donor, but LHA was slightly different. Part of the 5'UTR sequence of *PKLR* gene  
947 was inserted together the codon optimized cDNA of RPK (coRPK, 1.7kb) (19), a FLAG tag  
948 sequence, and the bGH polyadenylation signal (Figure S2). Consequently, the LHA was displaced

949 8bp upstream, leaving an 8-bp gap between the HAs corresponding to part of the 5'UTR  
950 sequence. The therapeutic donor was cloned similarly to reporter donor. Both therapeutic and  
951 reporter donors' cDNA were diverged.

952 rAAV vectors were produced in-house or commercially by Vigene Biosciences. In brief, rAAVs  
953 were made in HEK 293T cells using standard PEI transfection with 6µg ITR-containing plasmid  
954 and 22µg pDGM6 (kindly provided by Dr Russell), which contains the AAV6 cap genes, AAV2 rep  
955 genes, and adenovirus helper genes. After 72 hours, cells were harvested and centrifuged for 15  
956 minutes 2000rpm. Cell pellet was resuspended in lysis buffer (2mM MgCl<sub>2</sub> and 10mM TRIS/Cl,  
957 pH 8). Cells were lysed using five freeze-thaw cycles followed by 1h incubation at 37°C with  
958 Benzonase at 200 U/mL (Merck)). Finally, lysate was centrifuged at 4000rpm for 15 minutes at  
959 4°C and the supernatant was collected. Purification of AAVs from the supernatant was  
960 conducted through iodixanol density gradient (Sigma-Aldrich) AAV vectors were extracted at the  
961 58-40% iodixanol interface with 18-gauge metal syringe and stored at -80°C until the moment  
962 of use.

963

#### 964 **Off-target analysis**

965 Off-target analysis was performed based on the GUIDE-seq methodology (52). The workflow  
966 was described previously (40). In short, guideRNA complexes were generated using Alt-R®  
967 CRISPR-Cas9 crRNA XT and Alt-R®CRISPR-Cas9 tracrRNA, and transfected with a dsODN tag into  
968 HEK293 cells stably expressing Cas9 using the Nucleofector system (Lonza, Basel). After 72 hrs,  
969 genomic DNA was isolated followed by fragmentation and adapter ligation using the LOTUS™  
970 DNA Library Prep Kit (IDT). Libraries were generated by two rounds of amplification, followed by  
971 Illumina-based NGS.

972 Targeted amplification of edited alleles was performed using the rhAmpSeq™ system (IDT),  
973 which consisted of two rounds of amplification. The first round employs locus specific primers,  
974 and the second round introduces Illumina-compatible P5/7 sequences to create dual-indexed  
975 amplicon libraries.

976

#### 977 **Statistical analyses**

978 Statistical analyses were conducted using Prism software (7.0 version, GraphPad). For the  
979 analyses of experiments in which n<5, a non-parametrical two-tailed Mann-Whitney test was

980 performed when two variables were compared. For the comparison of multiple variables,  
981 Kruskal-Wallis with Dunn's multiple comparison tests were performed. In experiments in which  
982  $n > 5$ , a Kolmogorov-Smirnov test was done to assess the normal distribution of the samples. If  
983 samples showed a normal distribution, a parametric two tailed paired t-test (when two variables  
984 were compared) or an ANOVA with Turkey's multiple comparison tests when more variables  
985 were compared. If samples did not follow a normal distribution, the previously mentioned non-  
986 parametric tests were used. Significances and P values are indicated in the figures and/or  
987 legends. Additionally, the significance was represented by P-values: \* $P < 0.05$ , \*\* $P < 0.01$ ,  
988 \*\*\* $P < 0.005$  and \*\*\*\* $P < 0.001$ .
